# Molecular basis for the recognition of steroidogenic acute regulatory protein by the 14-3-3 protein family

Kristina V. Tugaeva<sup>1,2</sup>, James Titterton<sup>3</sup>, Dmitriy V. Sotnikov<sup>1</sup>, Eugene G. Maksimov<sup>1,4</sup>, Alfred A. Antson<sup>3</sup>, Nikolai N. Sluchanko<sup>1,4\*</sup>

<sup>1</sup>A.N. Bach Institute of Biochemistry, Federal Research Center of Biotechnology of the Russian Academy of Sciences, 119071 Moscow, Russia

<sup>2</sup>Department of Biochemistry, School of Biology, M.V. Lomonosov Moscow State University, 119991 Moscow, Russia

<sup>3</sup>York Structural Biology Laboratory, Department of Chemistry, University of York, York YO10 5DD, United Kingdom

<sup>4</sup>Department of Biophysics, School of Biology, M.V. Lomonosov Moscow State University, 119992 Moscow, Russia

\*Corresponding author:

Dr. Nikolai N. Sluchanko

Tel.: +74956603430

E-mail: [nikolai.sluchanko@mail.ru](mailto:nikolai.sluchanko@mail.ru)

**Keywords:** 14-3-3 protein, protein-protein interactions; steroidogenic acute regulatory protein STARD1; steroid hormones; crystal structure; cholesterol

## ABSTRACT

Steroidogenesis in adrenals and gonads starts from cholesterol transport to mitochondria by the steroidogenic acute regulatory protein STARD1, containing a mitochondrial import sequence followed by a cholesterol-binding START domain. Although mutations in this protein have been linked to lipid congenital adrenal hyperplasia, the mechanism of steroidogenesis regulation by the STARD1 remains debatable, hypothetically involving a molten-globule structural transition and interaction with 14-3-3 proteins. We show that, while the isolated START domain does not interact with 14-3-3, interaction is enabled by STARD1 phosphorylation at Ser57, close to the mitochondrial peptide cleavage site. Biochemical analysis of the STARD1 affinity towards 14-3-3 and crystal structures of 14-3-3 complexes with Ser57 and Ser195 phosphopeptides, suggest distinct roles of site-specific phosphorylations in recruiting 14-3-3, to modulate STARD1 activity, processing and import to mitochondria. Phosphorylation at Ser195 creates a unique conditional site, that could only bind to 14-3-3 upon partial unfolding of the START domain.

# INTRODUCTION

Steroid hormones control many processes including metabolism, immune functions and sex differentiation. Steroidogenesis in adrenals and gonads is kinetically limited by cholesterol transport to the inner mitochondrial membrane (IMM), where the enzymatic conversion of cholesterol into pregnenolone takes place [1]. In the acute phase, this bottleneck stage of steroidogenesis is largely dependent on the cAMP-dependent *de novo* synthesis and function of the steroidogenic acute regulatory protein StAR, also referred to as STARD1 [2-5]. Reduction, deletion or knockout of the *star* gene arrests steroidogenesis leading to the accumulation of cholesterol-enriched lipid droplets in the cytoplasm of steroidogenic cells [6, 7]. Likewise, a range of STARD1 mutations impair its function leading to autosomal recessive disorders called lipoid congenital adrenal hyperplasias (LCAH) [6]. The critical role of STARD1 in steroidogenesis is underlined by the ability of the wild-type STARD1 transgene to completely rescue the lethal STARD1<sup>-/-</sup> phenotype in knockout mice [8, 9].

Although STARD1 was discovered as early as in 1983 [4] (identified in 1994 [3]), its complete structure is still unknown and its mechanism of action remains the subject of much debate [1, 10, 11]. STARD1 is produced in our bodies as a pre-protein of 285 amino acids containing an N-terminal mitochondrial targeting sequence (first ~60 residues) and the so-called steroidogenic acute regulatory lipid-transfer (START) domain able to bind cholesterol (Fig. 1A). The START domain has the  $\alpha/\beta$  helix-grip fold (~210 amino acids) featuring a lipid-binding hydrophobic cavity [12] (Fig. 1B). This domain is found in 15 members of the START protein family, being present either as a sole domain or as part of a multidomain protein [10, 12], and is responsible for binding various lipids.

Crystal structures have been determined only for the apo forms of human STARD1 (3P0L) [13], STARD3 (5I9J [14] and 1EM2 [15]) and several other START domains [13]. No START domain structure in complex with cholesterol is available to date, however, flexibility of the  $\Omega_1$  loop and unfolding of the C-terminal  $\alpha_4$  helix have been implicated in cholesterol binding and release [16-18]. Although the molecular mechanism of cholesterol transfer remained unexplained, several hypotheses were put forward. Initially, it has been proposed that STARD1 transports cholesterol as a shuttle [15]. According to an alternative model of cholesterol transport, STARD1 adopts a molten globule-like conformation in the vicinity of mitochondrial membranes or at a lower pH inside the intermembrane space [19, 20]. A similar concept, involving unfolding of the START domain, has been adopted also for the functioning of STARD6 [21] and STARD3 proteins [22, 23]. Noteworthy, STARD3 is thought to serve as the regulator of steroidogenesis in placenta, the only steroidogenic tissue where STARD1 is not expressed [11, 22]. Cholesterol was suggested to foster a structural transition of STARD1, in a concentration-dependent manner [24, 25]. However, even though STARD1 unfolding was widely observed [19, 23, 26], and was directly linked to STARD1 functionality, it remains unclear how this process can be reversed to ensure delivery of ~400 cholesterol molecules per min by each STARD1 molecule during the acute phase of steroidogenesis [27]. Moreover, mutational analysis indicated that the ability of STARD1 to bind cholesterol, commonly assessed *in vitro* using fluorescent cholesterol analogs, such as 22-NBD-cholesterol (22NC) (Fig. 1C), was not directly linked to its steroidogenic activity [28].

The N-terminal leader sequence apparently directs the STARD1-mediated cholesterol transfer to mitochondria [29]. The processing of the human STARD1 pre-protein [27, 30, 31], regulated by

1 cAMP concentration [27] and STARD1 phosphorylation [32], is associated with its import to  
2 mitochondria, where eventually a processed protein is accumulated [19, 30]. The sequence of  
3 these molecular events is unclear due to the absence of a direct correlation between the STARD1  
4 cleavage and steroidogenic activity. Indeed, being immobilized in the outer mitochondrial  
5 membrane (OMM), the processed protein devoid of the leader peptide is still capable of  
6 promoting steroidogenesis, at least in certain cell types and at specific conditions [31]. This led  
7 to the attractive ‘pause-transfer’ hypothesis that for carrying out its function, STARD1 needs to  
8 reside in the OMM, until being imported into mitochondria for processing and inactivation [27,  
9 33]. While partially rescuing STARD1<sup>-/-</sup> phenotype in knockout mice, STARD1 devoid of the  
10 first 47 residues failed to provide sufficient cholesterol transport to the mitochondria of  
11 steroidogenesis cells *in vivo*, suggesting a more complex role of the mitochondrial targeting  
12 peptide in STARD1 functioning [8].

13 Originally described as a rapidly induced phosphoprotein [4, 5, 34, 35], STARD1 can undergo  
14 Ser/Thr phosphorylation [32, 36, 37], which is likely achieved with the help of the A-kinase  
15 anchoring proteins and the regulatory subunits of cAMP-dependent protein kinase (PKA) for  
16 more effective, location-specific STARD1 phosphorylation at the OMM [38, 39].  
17 Phosphorylation of highly conserved Ser57, located in the N-terminal part of the protein  
18 preceding the START domain (Fig. 1A, 1D), apparently had no direct effect on pregnenolone  
19 synthesis [32] but may interfere with the STARD1 processing due to Ser57 location close to the  
20 cleavage sites [30]. Phosphorylation by PKA at another conserved residue, Ser195 (Fig. 1D),  
21 enhanced steroidogenesis by 50% [32]. In contrast to the phosphorylatable wild-type transgene,  
22 STARD1 with the S195A amino acid substitution failed to rescue STARD1<sup>-/-</sup> phenotype in  
23 knockout mice, characterized by intracellular accumulation of cholesterol droplets, low level of  
24 steroid hormones and neonatal lethality [9]. These effects of Ser195 phosphorylation lacked  
25 mechanistic explanation, as modification of Ser195 didn’t change STARD1 folding, cholesterol-  
26 binding ability [28, 40] or the mitochondrial import efficiency *in vitro* [32]. The functional role  
27 of STARD1 phosphorylation remains largely unclear but likely involves the regulation of  
28 STARD1 interaction with other proteins.

29 The 14-3-3 family proteins have been recently described as direct STARD1 partners and  
30 regulators of steroidogenesis [41, 42]. These eukaryotic protein hubs are involved in a variety of  
31 regulatory functions via selective binding to protein partners phosphorylated at specific Ser/Thr  
32 residues [43], Fig. 2A. 14-3-3 binding can regulate protein activity, subcellular localization or  
33 mediate protein-protein interactions [44]. Human 14-3-3 proteins are expressed as 7 different  
34 isoforms (β, ζ, ε, σ, τ, γ, η) encoded by different genes [43]. They assemble into homo- and  
35 heterodimers [45] and can themselves undergo phosphorylation. Phosphorylation of a semi-  
36 conserved serine (Ser58 in 14-3-3ζ, Ser59 in 14-3-3γ), located at the dimer interface, destabilized  
37 14-3-3 dimer and affected protein functionality [46, 47]. Recent data suggested that  
38 phosphorylation of this serine in 14-3-3γ as well as 14-3-3 monomerization can affect 14-3-  
39 3/STARD1 interaction [41, 42]. Taken together, the available evidence suggest that, depending  
40 on STARD1 phosphorylation, 14-3-3 proteins can detain STARD1 in the cytoplasm, thereby  
41 regulating steroidogenesis [41, 42]. Yet, the structural basis for the 14-3-3/STARD1 interaction  
42 remained unknown.

43 Here, we dissected the binary interaction between 14-3-3 and STARD1 by considering the  
44 effects of the oligomeric state of 14-3-3 and phosphorylation of both proteins. In contrast to  
45 previous reports [42, 48], we show that START domains of STARD1 and STARD3 in their





secondary structure elements as in (B) and the Ser57 and Ser195 phosphorylation sites. The scale below reflects solvent accessibility (acc) as low (white), intermediate (cyan) or high (blue), calculated by ESPript 3.0 [49] based on the 3POL crystal structure.

## RESULTS

### Potential 14-3-3-binding sites in human STARD1

STARD1 was first identified as phosphoprotein upregulated in the acute phase of steroidogenesis in cAMP-stimulated adrenal cortex, corpus luteum and Leydig cells [4, 5, 34, 35]. Phosphorylation of certain Ser/Thr residues is a known prerequisite for 14-3-3 binding [43, 50]. SCANSITE 4.0 predicts that human STARD1 protein (residues 1-285) contains three candidate 14-3-3-binding motifs, namely, RRSS<sup>57</sup>LL, RRGs<sup>195</sup>TC, and RLES<sup>277</sup>HP. The first motif is located within the N-terminal part of the protein, upstream of the START domain, whereas the second and the third motifs reside inside the START domain (Fig. 1A). Out of the three, the RLES<sup>277</sup>HP sequence matches the canonical 14-3-3-binding motifs best (Fig. 2A). However, it is located within C-terminal  $\alpha$ -helical sequence that is not conserved among STARD1 orthologs (Fig. 1D). PhosphoSitePlus ([www.phosphosite.org](http://www.phosphosite.org)) defines Ser277 as a minor phosphorylation site, detected only in one study [51]. In contrary, the RRSS<sup>57</sup>LL and RRGs<sup>195</sup>TC motifs are defined as good targets for PKA [31, 32, 52, 53] and, therefore, may serve as 14-3-3-binding sites in human STARD1.

We constructed several human STARD1 variants (Fig. 2B): i) a standalone STARD1 domain (residues 66-285), ii) a processed STARD1 lacking N-terminal peptide but containing both Ser57 and Ser195 (two constructs, starting from residue 53 or residue 46), and iii) a full-length STARD1 (residues 1-285). Aiming to avoid previously reported problems with STARD1 aggregation [15], we prepared STARD1 variants as fusions with a cleavable maltose-binding protein (MBP) [26]. The proteins were highly pure (Fig. 2C) and showed a significant phosphorylation-related shift on native-PAGE when co-expressed with PKA (Fig. 2D). Importantly, further incubation of phosphoproteins with PKA *in vitro* did not increase electrophoretic mobility whereas addition of phosphatase returned the protein band to the initial position (Fig. 2D), suggesting stoichiometric phosphorylation of the obtained preparations. As expected, the phosphomimicking mutant S195E displayed a smaller shift due to partial charge imitation, simultaneously confirming that Ser195 is efficiently phosphorylated within the intact STARD1 domain (Fig. 2D) [32, 52, 54].

Despite a number of trials that included different expression strains, temperatures, levels of induction, purification in the presence of detergents and protein refolding from inclusion bodies, it proved impossible to obtain soluble full-length STARD1<sub>1-285</sub>. Hence, the longest viable constructs examined in this study lacked the N-terminal residues 1-45.

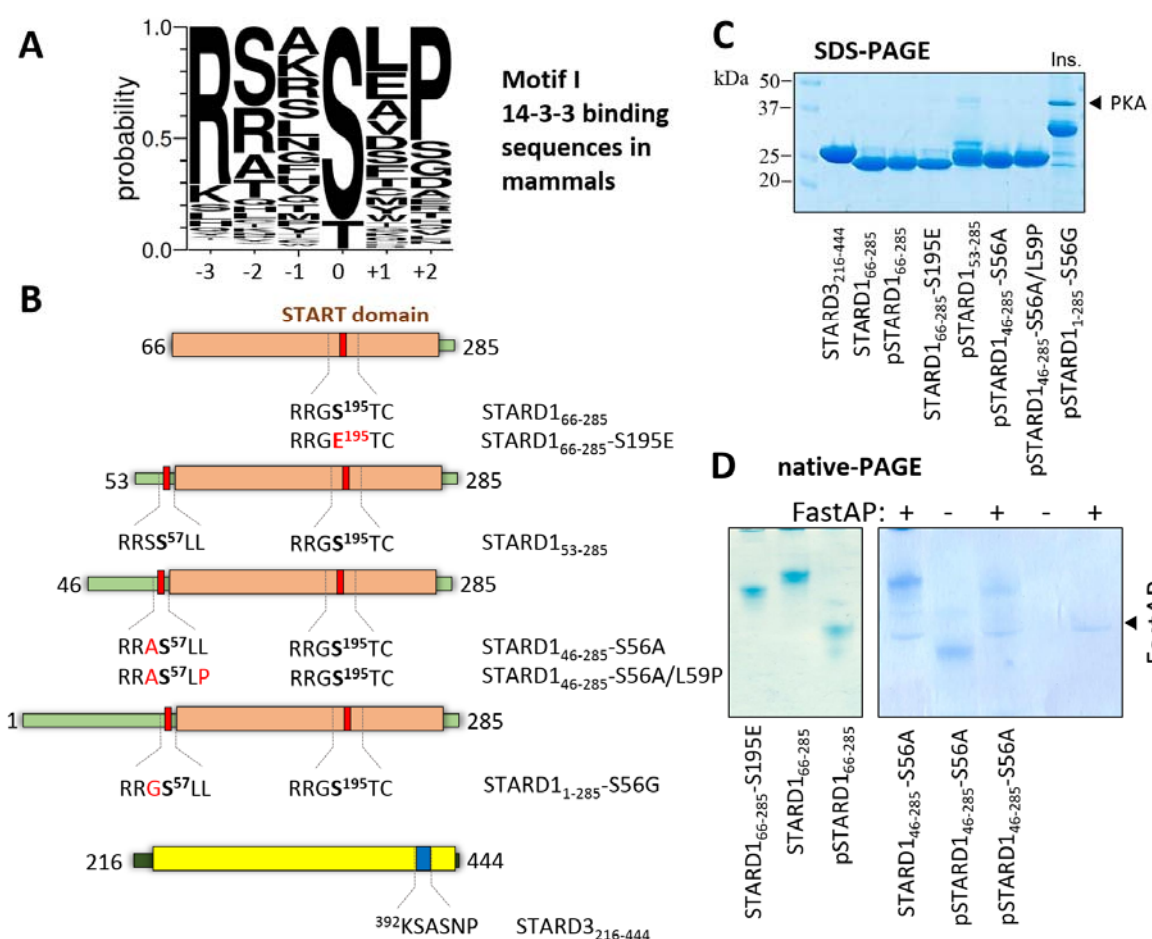

**Fig. 2. Human STARD1 and STARD3 proteins used in this study.** A. Normalized Weblogo [55] diagram showing the consensus 14-3-3 binding sequence motif derived by aligning 217 sequences of mammalian 14-3-3 partners [56]. C-terminal binding motifs were not included. The central residue (position 0) is phosphorylated. B. Scheme showing STARD1 and STARD3 constructs used. The central phosphorylatable STARD1 residues are shown in bold and mutated amino acids in red. C. SDS-PAGE of protein samples used in this work. Note that all constructs were soluble except for the full-length STARD1 (Ins.). D. Native PAGE showing the effect of phosphorylation of several STARD1 constructs. To reverse phosphorylation, phosphatase (FastAP) was added in the “+” samples (FastAP position on the gel is indicated by arrow).

### Interaction of STARD1 constructs with 14-3-3

First, we questioned whether the START domain can interact with 14-3-3 (Supplementary Fig. 1). As we showed previously, in solution STARD1<sub>66-285</sub> predominantly exists in a monomeric conformation equivalent to the crystallographic monomer (PDB 3P0L) [54] and is capable of binding steroids [26, 40]. Likewise, we produced and characterized the START domain of the closest STARD1 homolog, STARD3, which, in the context of non-expressed STARD1, is responsible for steroidogenesis in placenta [11, 22]. According to the synchrotron SAXS data, our STARD3 sample revealed a very similar solution protein structure to that of STARD1 (Supplementary Fig. S2). The START domain of either protein was mixed with 14-3-3, but even

1 the highest protein concentrations did not allow us to detect the interaction using analytical size-  
2 exclusion chromatography (SEC). No interaction was observed regardless of whether STARD1  
3 was PKA phosphorylated at Ser195 or not, and regardless of whether the dimeric 14-3-3 or the  
4 engineered monomeric 14-3-3 form, m58E mutant [57], were used (Supplementary Fig. 1). A  
5 similar result was obtained for the phosphomimicking S195E mutant of STARD1, or a different  
6 14-3-3 isoform (Supplementary Fig. 1). The inability to detect even weak complexes of 14-3-3  
7 with STARD1 phosphorylated at Ser195 was unexpected. Although the structure of the Ser195  
8 containing motif, a short loop connecting  $\beta$ -strands, is inconsistent with the flexible extended  
9 conformation required for binding to 14-3-3, it has been proposed to be the main determinant for  
10 binding [41].

11 Likewise, although STARD3 was recently reported to bind 14-3-3 in a phosphorylation-  
12 *independent* manner using the 392-KSASNP-397 motif [48] located in the  $\beta$ 8- $\beta$ 9 loop (PDB  
13 code 5I9J [14]), our sample of STARD3 did not display any interaction neither with the 14-3-3  
14 dimer nor the engineered 14-3-3 monomer (m58E) (Supplementary Fig. 2). Together, these data  
15 disfavored the possibility of tight binding of natively folded isolated START domains of  
16 STARD1 and STARD3 to 14-3-3 proteins.

17 Therefore, we extended the STARD1 construct and produced STARD1<sub>53-285</sub> protein which  
18 contained phosphorylatable Ser57, in addition to Ser195. The protein was co-expressed with  
19 PKA and produced in a rather low yield. Mass-spectrometry analysis revealed phosphorylation  
20 of human STARD1<sub>53-285</sub> at not only conservative Ser195 and Ser57, but also the neighboring,  
21 semi-conservative residue, Ser56 (Supplementary Table 1 and Supplementary Fig. 3).  
22 Phosphorylation of these neighboring serines in rat STARD1 was also achieved by PKG [51]. As  
23 observed previously for the 14-3-3 interaction with Cdc25B phosphatase [58], such tandem  
24 phosphorylation can preclude binding to 14-3-3.

25 Therefore, to avoid the Ser56 phosphorylation detected in STARD1<sub>53-285</sub> and taking benefit from  
26 the presence of alternative residues in close orthologs (Fig. 1D), we have replaced Ser56 with  
27 Ala. To improve the yield and solubility, we extended the constructs at the N terminus to residue  
28 46. In addition to the authentic version of the protein, STARD1<sub>46-285</sub>-S56A, we also created  
29 construct STARD1<sub>46-285</sub>-S56A/L59P which contained the canonical Pro in the +2 position of the  
30 phosphoserine-57 peptide owing to the L59P mutation (Fig. 2). Both versions were co-expressed  
31 with PKA and purified to homogeneity similar to STARD1<sub>66-285</sub> (Fig. 2C, D). Phosphorylation of  
32 Ser57 and Ser195 was confirmed by mass-spectrometry (Supplementary Table 1 and  
33 Supplementary Fig. 3) and led to a complete shift on native PAGE (Fig. 2D) confirming  
34 stoichiometric phosphorylation. This is in line with earlier observations that Ser57 and Ser195  
35 are good substrates of PKA [32, 52] and that its co-expression pushes phosphorylation of the  
36 cognate sites to completion [59, 60].

37 Analytical SEC revealed interaction of 14-3-3 with extended STARD1 constructs  
38 phosphorylated at both, Ser57 and Ser195 positions ("pSTARD1"). Interaction of the  
39 STARD1<sub>46-285</sub>-S56A/L59P protein was significantly enhanced compared to the STARD1<sub>46-285</sub>-  
40 S56A (Fig. 3A). Remarkably, the latter protein construct, representing the authentic processed  
41 STARD1, showed interaction with 14-3-3 $\epsilon$  and 14-3-3 $\gamma$  isoforms that are up-regulated in the  
42 acute phase of steroidogenesis [41], but complexes were insufficiently stable to give a distinct  
43 peak on the elution profile (Fig. 3B). In contrast, titration of 14-3-3 by phosphorylated  
44 STARD1<sub>46-285</sub>-S56A/L59P ensured the appearance of a peak corresponding to the protein  
45 complex and allowed rough estimation of its apparent Mw as ~93 kDa (Fig. 3C), indicating 2:2

binding stoichiometry. Poor separation of 93 kDa and 53 kDa peaks hinted at the presence of an intermediate peak. Indeed, deconvolution of the SEC profile revealed formation of a 2:1 (72 kDa) complex in addition to 2:2 (93 kDa) species, observed for the interaction of 14-3-3 with doubly phosphorylated STARD1 (Fig. 3D). The presence of the intermediary 2:1 peak could in addition explain the titration pattern observed in Fig. 3C. Overall, these results are in line with the optimization within the Ser57-containing motif, owing to the L59P substitution, indicating at the same time that Ser57 phosphosite contributes to the interaction with 14-3-3. The relatively efficient formation of 2:2 complexes in addition to 2:1 complexes indicates that the Ser195 phosphosite is not a significant contributor to the interaction. In any case, the presence of large amounts of unbound proteins during the SEC analysis, even upon the highest used concentrations, indicated weak affinity, requiring quantitative analysis.

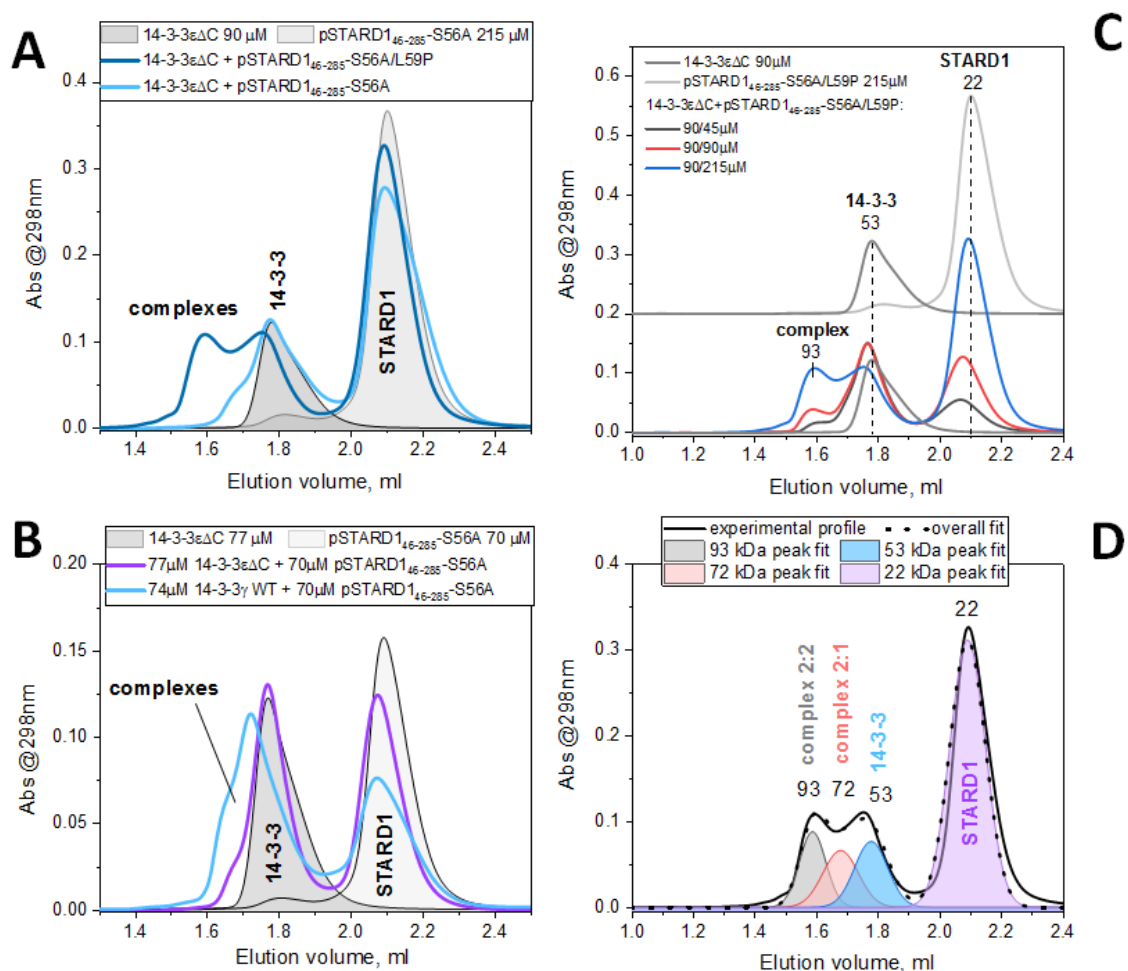

**Fig. 3. Interaction of STARD1 phosphorylated at both, Ser57 and Ser195, with 14-3-3.** Interaction has been analyzed by size-exclusion chromatography using STARD1<sub>46-285</sub>-S56A and STARD1<sub>46-285</sub>-S56A/L59P constructs. The individual proteins or their mixtures at indicated molar concentrations were pre-incubated for over 20 min at room temperature before loading into Superdex 200 Increase 5/150 column at a 0.1 ml/min flow rate. Mw values, estimated from column calibration, are indicated in kDa. The peaks of the complexes are marked. Panel A shows comparison of the 14-3-3εΔC binding to phosphorylated STARD1<sub>46-285</sub>-S56A and STARD1<sub>46-285</sub>-S56A/L59P at a given concentration ratio (90 μM 14-3-3 and 215 μM STARD1, each per



monomer). Panel B shows binding of the phosphorylated STARD1<sub>46-285</sub>-S56A to two different dimeric 14-3-3 constructs (molar concentrations per monomer are indicated). Panel C shows titration of 14-3-3 $\epsilon\Delta$ C by phosphorylated STARD1<sub>46-285</sub>-S56A/L59P (molar ratios are indicated). Panel D shows deconvolution of the chromatographic profile corresponding to a mixture of 90  $\mu$ M 14-3-3 $\epsilon\Delta$ C and 215  $\mu$ M of phosphorylated STARD1<sub>46-285</sub>-S56A/L59P allowing to detect two peaks of the complexes with different stoichiometries.

## Affinity between 14-3-3 and doubly phosphorylated STARD1

We used surface plasmon resonance (SPR) to quantify the interaction between doubly phosphorylated STARD1<sub>46-285</sub>-S56A/L59P and 14-3-3 immobilized on a chip using the N-terminal His-tag. Given the up-regulation of 14-3-3 $\gamma$  and 14-3-3 $\epsilon$  isoforms (4 and 1.6 times, respectively) during the acute phase of steroidogenesis [41] and the unique preference of 14-3-3 $\epsilon$  to heterodimerize with other 14-3-3 isoforms [61, 62], we produced the 14-3-3 $\epsilon/\gamma$  heterodimeric species for further analysis (Fig. 4A). The obtained sensorgrams yielded an apparent  $K_D$  of 13  $\mu$ M for 14-3-3 $\epsilon$  and 15  $\mu$ M for 14-3-3 $\epsilon/\gamma$  (Fig. 4B and Table 1) (See Methods for details). The  $K_D$  values are in the same range as reported for the singly phosphorylated HSPB6 peptide RRAPs<sup>16</sup>APL binding to 14-3-3 [63]. This indicates that, most likely, the only contributor to the interaction is the Ser57 site of pSTARD1 (RRAPs<sup>57</sup>LPG). Analysis using STARD1<sub>46-285</sub>-S56A did not yield useful data due to limited sample solubility, however, given the SEC data (Fig. 3A, B), much larger  $K_D$  values could be expected in this case.

It is known that binding to 14-3-3 dimers is greatly enhanced for doubly compared to singly phosphorylated peptides [50]. In this respect, the affinity of the interaction measured by SPR (13-15  $\mu$ M) was much lower than expected for binding using two phosphosites. This questioned whether both Ser57 and Ser195 sites contributed to interaction with the 14-3-3 dimer.

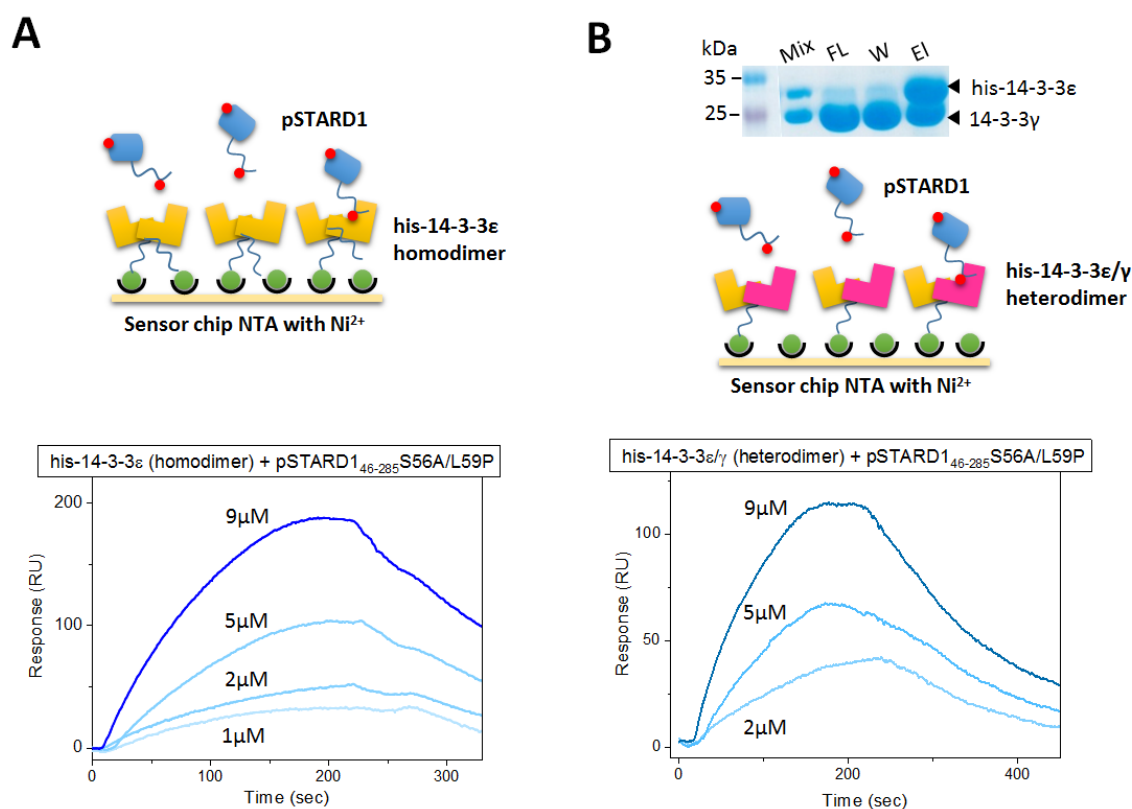

**Fig. 4. Interaction of doubly phosphorylated STARD1 with 14-3-3.** Binding of STARD1<sub>46-285</sub>-S56A/L59P to either 14-3-3ε or its heterodimer with 14-3-3γ was analyzed by surface plasmon resonance. A. pSTARD1 binding to the His-tagged 14-3-3ε homodimer immobilized on a Ni-NTA chip. B. pSTARD1 binding to the heterodimer formed by the His-tagged 14-3-3ε and 14-3-3γ immobilized on a Ni-NTA chip. *Top*, schematic of the experiment; *bottom*, sensorgrams obtained for different flow concentrations of pSTARD1. Panel B also shows SDS-PAGE of the fractions obtained during preparation of the 14-3-3 heterodimer based on selective binding of His-tagged 14-3-3ε on the immobilized metal-affinity chromatography column and the unique preferential heterodimerization propensity of this isoform [62]. Mix – the initial mixture loaded on the IMAC column, Fl – flowthrough, W – washed fraction, El – eluate.

### Crystal structures of 14-3-3 complexes with STARD1 phosphopeptides

To obtain structural insights into the 14-3-3 interaction with STARD1 phosphopeptides, we exploited the recently introduced approach [60], which is particularly useful for transient and unstable interactions. To this end, we fused either the RRSS<sup>57</sup>LLGSR or RRGs<sup>195</sup>TCVLA peptide of STARD1 to the C terminus of the 14-3-3 $\sigma$  $\Delta$ C core via a GSGSL linker. This approach allows to enhance binding of phosphopeptides, while normally preserving its authentic binding conformation [60]. The resulting chimeric proteins containing the Ser57 and Ser195 peptides were co-expressed with PKA to ensure stoichiometric phosphorylation of the target sites, purified and their structures were determined by protein crystallography at 2.04 and 2.63 Å resolution, respectively (Supplementary Tables 2,3).

1 In the Ser57 peptide structure, only Ser57 is phosphorylated and bound in the amphipathic  
2 groove of 14-3-3. The traceable residues RRSpSLL adopt a conformation and a sophisticated  
3 network of polar contacts that are typical for the mode I peptides bound to 14-3-3 (Fig. 5), with  
4 the caveat that position +2 is occupied by the non-canonical leucine, which is expected to make  
5 the interaction less stable. Despite the relatively high resolution, three C-terminal residues of the  
6 peptide, GSR, are not seen due to disorder.

7 The structure for the protein with fused Ser195 peptide is unusual as the two 14-3-3 protomers  
8 bind the Ser195 peptides in two distinct conformations, an extended and a bent one, with all  
9 residues of the RRGP<sup>195</sup>TCVLA peptide traceable (Fig. 6). In the first case, the adopted  
10 conformation displays the characteristic kink outward the amphipathic groove, despite Cys197  
11 occupying the position of the canonical kink-promoting Pro residue at position +2. In the second  
12 case, the peptide adopts a turn in the polypeptide chain (Fig. 6). Although both conformations  
13 preserve contacts typical for the 14-3-3:phosphopeptide interactions, the extended conformation  
14 appears to be more advantageous due to additional hydrophobic contacts made by V198-L199  
15 residues of the peptide (Fig. 6).

16 Notably, even the bent conformation of the Ser195-peptide observed in the present crystal  
17 structure (Fig. 6, right) is completely different to its  $\beta$ 6- $\beta$ 7 loop conformation seen in the crystal  
18 structure of the stand-alone STARD1 domain (Fig. 1B and 7). In particular, Arg192 and Cys197  
19 residues occupy the classic 14-3-3 binding determinants at positions -3 and +2 (Fig. 2A) [50]. It  
20 is clear that these residues cannot contribute to 14-3-3 binding in the context of the natively  
21 folded STARD1 conformation where they are part of a tight  $\beta$ 6- $\beta$ 7 loop within the 9-stranded  $\beta$ -  
22 sheet (Fig. 1B).

23 Of note, in structures of all 14-3-3 complexes with bound phosphopeptides or complete partner  
24 domains, phosphopeptides have relatively extended conformations, in line with the preferential  
25 binding of intrinsically disordered peptides [64]. Thus, in order to be bound in the amphipathic  
26 groove in a conformation typical for many phosphopeptide targets, the  $\beta$ 6- $\beta$ 7 hairpin has to  
27 unfold and adopt the extended conformation (Fig. 7). These considerations are in line with our  
28 SEC data indicating that i) in their native conformation, neither STARD1 nor STARD3 domain  
29 show any appreciable binding to 14-3-3 (Supplementary Figs 1 and 2) and ii) that even the  
30 doubly phosphorylated STARD1 constructs display only moderate affinity towards 14-3-3 (Fig.  
31 3 and 4). Interestingly, the 6-residue loop containing Ser195 appears flexible enough to allow for  
32 phosphorylation of this site within the folded recombinant STARD1 (Fig. 2D). The difference  
33 with respect to 14-3-3 is apparently explained by the fact that PKA recognizes RRXS substrate  
34 motif which is only part of the consensus sequences for 14-3-3 (Fig. 2A) and, therefore, has less  
35 strict structural restrictions. Indeed, it is known that even non-contiguous structural sites on the  
36 surface of globular proteins can serve substrates for efficient phosphorylation [65].

37 Since only the native conformation of the  $\beta$ 6- $\beta$ 7 hairpin segment encompassing the Ser195  
38 phosphosite would be compatible with the sterol binding, we decided to probe this by time-  
39 resolved anisotropy measurements using the fluorescently labelled cholesterol analog, 22NC.

40

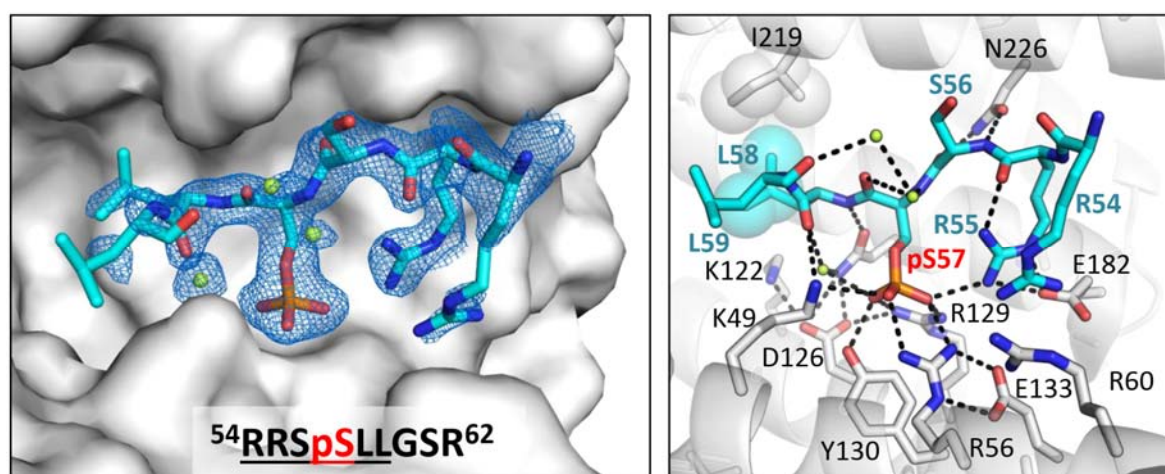

**Fig. 5. Molecular interactions of 14-3-3 $\sigma$  with the Ser57-containing STARD1 phosphopeptide revealed by 2 Å crystal structure.** *Left*, 14-3-3 is shown as molecular surface (grey), peptide (atomic model with carbons in cyan, oxygens in red, nitrogens in blue and phosphate in orange) is shown with the corresponding 2F<sub>o</sub>-F<sub>c</sub> electron density maps contoured at 1 $\sigma$ . Water molecules are in limon green. Residues of the phosphopeptide clearly visible in the electron density, are underlined in the sequence shown below. *Right*, A magnified view showing the network of 14-3-3:peptide interactions with several key 14-3-3 residues labelled in plain font and the peptide residues labelled in bold, with the central phosphoserine label in red. Polar contacts are shown by black dashed lines, hydrophobic contacts are shown by semitransparent spheres.

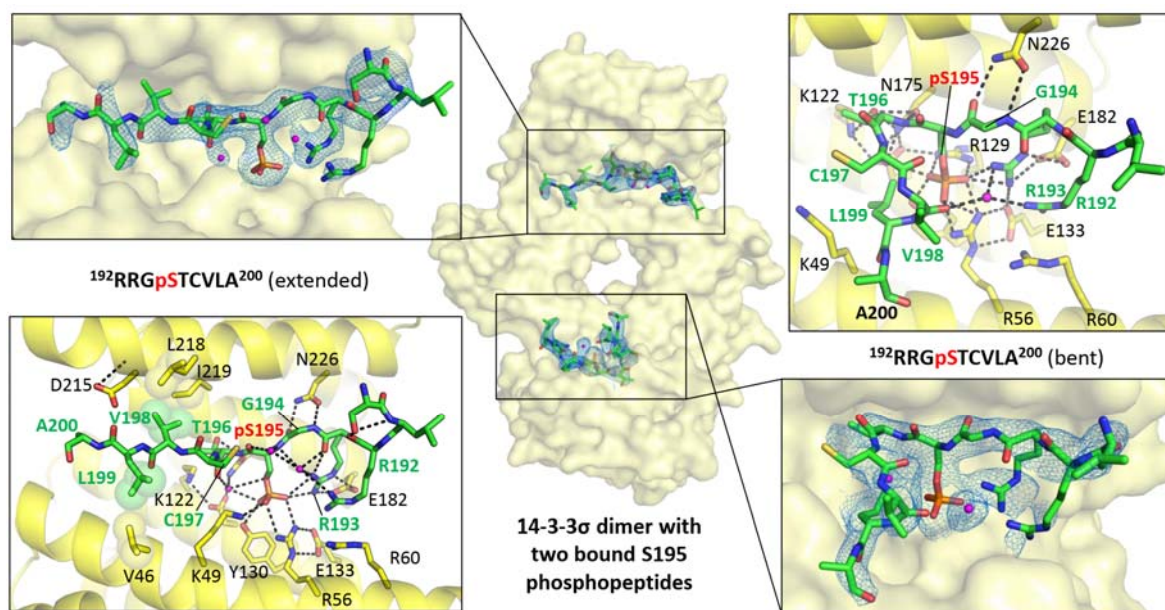

**Fig. 6. Molecular interactions of the 14-3-3 protein with the Ser195-containing STARD1 phosphopeptide.** Crystal structure, derived at 2.6 Å resolution, revealed two distinct conformations of the phosphopeptide, with all residues traced for each conformation. *Middle*, the overall view of the 14-3-3 dimer with the two peptides occupying amphipathic grooves. *Left*, a closeup view showing molecular interactions for the extended conformation of the



phosphopeptide. *Right*, a closeup view at the bent conformation of the phosphopeptide with carbon atoms in green, nitrogens in blue, oxygens in red, water molecules in magenta.  $2F_o - F_c$  electron density corresponding to the phosphopeptide is contoured at  $1\sigma$ . Several key 14-3-3 residues are labelled in plain font and the peptide residues labelled in bold, with the central phosphoserine label in red. The phosphopeptide sequences are also depicted, with the central phosphoserine label in red. Hydrophobic contacts involving the C-terminal V198-L199 residues of the phosphopeptide are shown by semitransparent spheres.

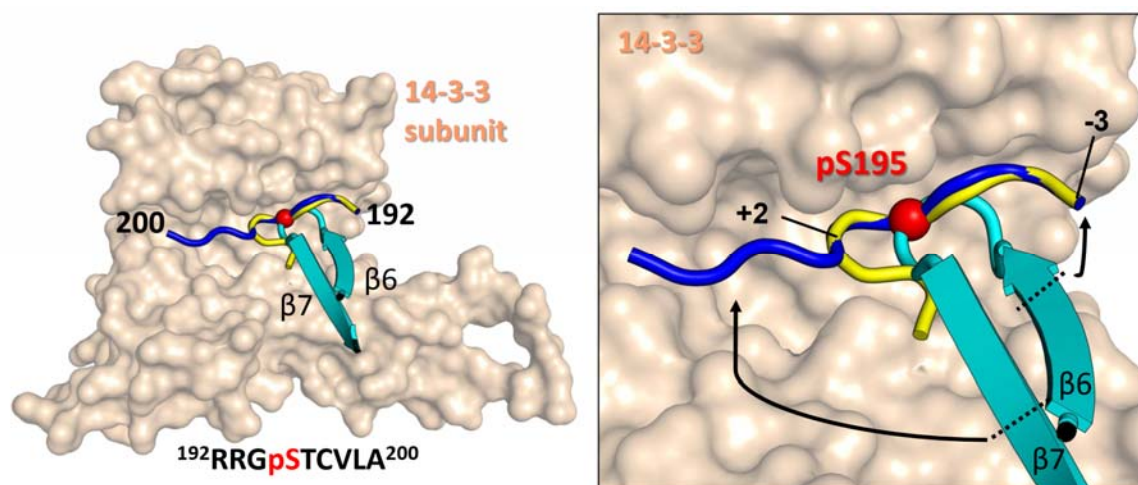

**Fig. 7. Comparison of the STARD1 Ser195 peptide conformation in the 14-3-3 bound and unbound states.** Two conformations of the phosphopeptide observed in complex with 14-3-3 (Fig. 8) are overlaid with the conformation observed within the STARD1 structure where the phosphopeptide is part of the  $\beta 6$ - $\beta 7$  hairpin (PDB 3P0L), which suggests conditional binding to 14-3-3. *Left*, overall view at the 14-3-3 subunit with the three conformations of the Ser195-peptide shown in three different colors. The peptide sequence is shown below, phosphoserine-195 is in red. *Right*, a closeup view at the binding site showing tentative unfolding (black arrows) that is required for the  $\beta 6$ - $\beta 7$  loop to adopt an extended conformation.  $\text{Ca}$  atoms of the key 14-3-3 binding amino acids at positions -3 and +2 relative to the central phosphoserine (red) are indicated.

### In complex with 14-3-3, doubly phosphorylated STARD1 retains native conformation capable of ligand binding

The kinetics of fluorescence anisotropy for free 22NC, 22NC in complex with phosphorylated STARD1<sub>46-285</sub>-S56A/L59P and 22NC in a larger complex between the 22NC-bound STARD1 and 14-3-3, were measured with picosecond time resolution (Fig. 8A). In common with other cholesterol derivatives carrying the NBD group [40], in the absence of proteins 22NC fluorescence was significantly quenched by solvent. Relaxation of 22NC fluorescence anisotropy was characterized by a  $115 \pm 23$  ps time constant (Fig. 8B), which corresponds to quickly rotating solvatochromic fluorophores. Addition of 10-molar excess of phosphorylated STARD1<sub>46-285</sub>-S56A/L59P led to a 116-fold increase in the fluorescence signal and altered the kinetics of fluorescence anisotropy. The latter became clearly biphasic, with almost identical

1 yield of fast ( $84 \pm 6$  ps, 48.0%) and slow ( $9.2 \pm 0.2$  ns, 52.0%) components (Fig. 8B). The  
2 appearance of the additional component with a longer correlation time of  $\sim 9.2$  ns can be  
3 explained only by formation of a 27 kDa complex of the 22NC with STARD1, which  
4 corresponds to a much slower rotation and has the predicted correlation time of 11 ns (See  
5 Methods for details). Although the presence of the fast component indicates that the 22NC  
6 fluorophore can rotate with a rate similar for the free dye, we assigned this component to 22NC  
7 accommodated within the cholesterol-binding cavity of STARD1, due to the following reasons.  
8 First, given the nanomolar ligand binding affinity [40] and the concentrations used (1  $\mu$ M ligand  
9 and 10  $\mu$ M STARD1), all 22NC molecules are expected to be bound to STARD1. Second, the  
10 solvatochromic property of 22NC would mean  $\sim 116$  times lower fluorescence signal from the  
11 dissociated dye that could not be detected in the presence of the dominating protein-bound form.  
12 In the presence of an excess of 14-3-3 $\gamma$ , we observed the biphasic kinetics of fluorescence  
13 anisotropy, with the fast ( $72 \pm 6$  ps, 51.4%) and slow ( $40.0 \pm 0.8$  ns, 48.6%) components (Fig.  
14 8B). Importantly, the long correlation time significantly increased compared to that in the  
15 absence of 14-3-3 (9.2 ns), which can be explained by formation of a larger protein complex  
16 embedding 22NC that further restricts its rotation speed. The experimental value of 40 ns agrees  
17 well with the correlation time of 35 ns predicted for the 85 kDa 14-3-3 $\gamma$ /pSTARD1/22NC 2:1:1  
18 complex that is expected to be a dominant 22NC-containing species at concentrations used.  
19 Difference between the observed (40 ns) and predicted (35 ns) species can be explained by a  
20 non-spherical shape of the complex (Fig. 8A). As in the STARD1/22NC complex, the presence  
21 of the fast component ( $72 \pm 6$  ps) indicates that 14-3-3 binding does not affect the ability of the  
22 fluorophore to rotate within the cholesterol-binding cavity. The formation of the larger 22NC  
23 complex with STARD1 and 14-3-3 appears to preserve the rotational freedom of the  
24 solvatochromic NBD group in the bound ligand, which explains fast depolarization of NBD  
25 fluorescence.  
26 Together these data demonstrate that in complex with 14-3-3, the phosphorylated STARD1  
27 retains its ligand-binding ability and conformation. This observation disproves the notion that the  
28 Ser195-phosphosite contributes to the interaction with 14-3-3. Such interaction would require  
29 significant structural rearrangements in STARD1 which could, in principle, take place *in vivo*,  
30 for example during the proposed molten-globule-like structural transformation of STARD1 or  
31 when it undergoes unfolding accompanying its import into mitochondria.  
32  
33

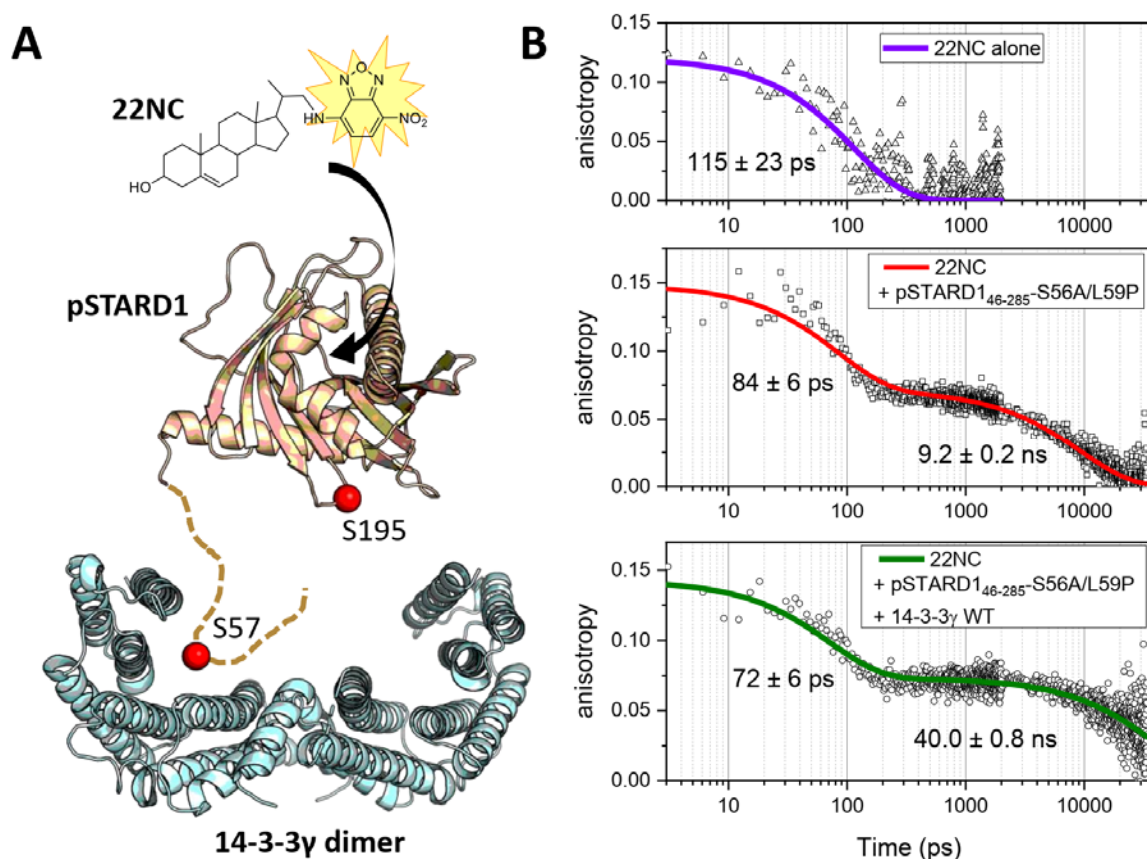

**Fig. 8. STARD1<sub>46-285</sub>-S56A/L59P phosphorylated at Ser57 and Ser195 retains ligand-binding ability upon interaction with 14-3-3γ.** A. Graphical abstract of the experiment. NBD-labeled cholesterol analog 22NC (1 μM) was supplemented with 10:1 molar excess of phosphorylated STARD1<sub>46-285</sub>-S56A/L59P (10 μM) and then wild type 14-3-3γ (100 μM) was added at further 10-fold excess, to ensure complete binding of the 22NC reporter. Protein partners are shown in scale using PDB 3P0L (STARD1) and 6S9K (14-3-3γ). B. The kinetics of the 22NC fluorescence anisotropy was recorded with single-photon counting and picosecond temporal resolution for free 22NC (top graph), its complex with pSTARD1 (middle) and within the 14-3-3γ-bound pSTARD1 (bottom). Numbers indicate corresponding correlation times.

# DISCUSSION

In spite of critical importance for physiology and therapy, the mechanism of regulation of steroidogenesis by STARD1 remains puzzling. Upon tropic hormone stimulation, this protein is expressed *de novo*, targeted to the mitochondria and rapidly accumulated as phosphoprotein [3, 4, 11, 35]. STARD1 appears to cooperate with other proteins at the outer mitochondrial membrane (OMM) [66] (Fig. 9, **step 1**), where its phosphorylation in response to elevated cAMP occurs with the help of anchored regulatory subunits of PKA [38, 39, 67]. Recent data indicate that members of the 14-3-3 protein family, up-regulated in the acute phase of steroidogenesis [41], can partner with STARD1 (Fig. 9, **step 2**). It was proposed that, depending on phosphorylation of STARD1 and 14-3-3 and on the oligomeric state of 14-3-3, 14-3-3 can negatively affect steroidogenesis by binding to STARD1 [41, 42]. Intriguingly, STARD1 contains at least two putative 14-3-3 binding motifs centered at Ser57 and Ser195, that are readily phosphorylated by PKA ([32] and this work). In addition, it has been reported that STARD3, a close paralog of STARD1 possessing the same fold of its cholesterol-binding domain and responsible for placental steroidogenesis [11, 22], can interact with 14-3-3 proteins in a phosphorylation-independent manner using its KSASNP motif [48].

Despite intensive research, many questions remained about the molecular mechanism of STARD1 regulation, prompting us to dissect the role of the START domain and the two principal phosphorylation sites present in STARD1, in interaction with the 14-3-3 protein. This analysis was carried out using soluble versions of STARD1 lacking part of the N-terminal peptide responsible for mitochondrial localization.

Our data show that despite the presence of the previously reported 14-3-3 binding elements such as the phosphosite around Ser195 in STARD1 and the KSASNP motif in STARD3, isolated START domains of STARD1 and STARD3 do not form stable complexes neither with dimeric nor monomeric forms of 14-3-3, even at the high protein concentrations (Supplementary Fig. 1 and 2). However, stepwise extension of the STARD1 construct along the N terminus (Fig. 2) led to detectable interaction. The extended STARD1 construct that interacted with 14-3-3 was phosphorylated at both Ser57 and Ser195 positions, with the interaction observed only for the dimeric 14-3-3 proteins (Fig. 3), and not the monomeric 14-3-3 mutant m58E protein (data not shown). While optimization of the Ser57-peptide by L59P amino acid substitution enhanced interaction with 14-3-3, the Ser195 phosphosite residing in the native START domain did not appear to contribute into 14-3-3 binding. As a result, the micromolar binding affinity of the doubly phosphorylated native STARD1 to 14-3-3 (13-15  $\mu$ M) was similar to that of a singly phosphorylated peptide with a similar sequence (Fig. 3-4). Crystallographic analysis of molecular interactions with 14-3-3 revealed canonical conformations for both Ser57 and Ser195 phosphopeptides (Figs 5-6).

The Ser57 phosphopeptide (RRSpS<sup>57</sup>LLGSR) of STARD1 is expected to be intrinsically disordered (Fig. 1) and appears to be a critical 14-3-3-binding site. Notably, almost identical phosphopeptides, RRSpS<sup>87</sup>LLSRS in the human proapoptotic Bcl-2-like protein 11 (Uniprot O43521) and RRSpS<sup>435</sup>LLSLM in the RAB11 family interacting protein 1 (Uniprot Q6WKZ4), can likewise be recognized by 14-3-3. Based on identical core residues underlined in the sequences above, it can be expected that primary interactions of these two proteins with 14-3-3 are the same as seen in the crystal structure of the phospho-Ser57 peptide of STARD1, reported



1 here. Together, the three 14-3-3 interaction partners represent a rare example of proteins with  
2 almost identical 14-3-3-binding segments.  
3 The biological role of the Ser195 phosphopeptide (RRGpS<sup>195</sup>TCVLA) is intriguing. Although it  
4 has a suboptimal 14-3-3 binding sequence, it is well-defined in crystal structures. It is able to  
5 adopt at least three different conformations: the two distinct, extended conformations reported  
6 here and as part of a rigid  $\beta$ 6- $\beta$ 7 hairpin in the intact STARD1 (PDB 3P0L) [13]. According to  
7 the gatekeeper hypothesis introduced by Yaffe [68], a doubly phosphorylated polypeptide  
8 containing even suboptimal 14-3-3 binding sites could lead to a highly cooperative conditional  
9 binding owing to an increased local concentration of the second binding site (Ser195) following  
10 the primary Ser57-site binding. Nevertheless, we could not detect the expected, high-affinity  
11 interaction with 14-3-3 for the phosphorylated STARD1 containing START domain capable of  
12 binding fluorescently labeled cholesterol analog 22NC (Fig. 8). The extended conformations of  
13 the Ser195 peptide observed in the crystal structure (Fig. 6) strongly indicate that the Ser195  
14 phosphosite can contribute to 14-3-3 binding only upon partial unfolding of the  $\beta$ -sheet that  
15 comprises the Ser195 phosphopeptide. Hence, the folded state of the START domain prevents it  
16 from adopting alternative conformation necessary for binding to 14-3-3 (Fig. 7). To our  
17 knowledge, such conditional binding to 14-3-3 proteins has not been structurally characterized  
18 before. This precedent warns prediction of 14-3-3 binding sites based on simple conformity to  
19 14-3-3 binding consensus motifs and location in the intrinsically disordered regions, as cryptic  
20 14-3-3 binding sites can most likely exist in other proteins.  
21 Based on the available evidence, we hypothesize that the Ser57 phosphosite plays a role in the  
22 14-3-3-mediated attachment of STARD1 to transducosome (Fig. 9, **step 2**). The residence of  
23 STARD1 at the OMM likely involves molten-globule structural transition [19, 24]. In so far  
24 poorly understood cooperation with other proteins at the OMM, this enables repeated cholesterol  
25 binding and release (Fig. 9, **step 3**), to ensure cholesterol delivery to the cholesterol side-chain  
26 cleavage cytochrome P450 (P450<sub>scc</sub>) (Fig. 9, **step 3**), which converts it into pregnenolone [1].  
27 Since Ser57 is proximal to the predicted sites of STARD1 processing (residues 55-56 [30]), 14-  
28 3-3 binding to this site in intact STARD1 would also regulate its mitochondrial import (Fig. 9,  
29 **steps 4 and 5**). Indeed, 14-3-3 binding is known to inhibit proteolytic degradation,  
30 dephosphorylation and aggregation of target proteins [69-71] (Fig. 9, **step 6**). Therefore, 14-3-3  
31 interaction with phosphorylated Ser57 would sequester STARD1 in the cytoplasm by interfering  
32 with its mitochondrial import and processing. This, in turn, can prolong the action of STARD1  
33 as a key factor in cholesterol transport, during the acute phase of steroidogenesis, in line with the  
34 'pause-transfer' hypothesis. It is pertinent to note that 14-3-3 also interacts with the  
35 phosphorylated mitochondrial import sequence of the iron-sulfur cluster assembly enzyme [72].  
36 Our results support the notion that the Ser195 phosphosite can also contribute to binding to the  
37 14-3-3, but only upon STARD1 unfolding [41] (Fig. 9, **steps 4-6**). This mode of binding is  
38 relevant to the reported chaperone-like, anti-aggregation activity of 14-3-3 [71], and can  
39 accompany structural transition of STARD1 into a molten-globule conformation [19, 21, 24]  
40 (Fig. 9, **step 3**). Such interaction may also occur upon STARD1 unfolding during the  
41 mitochondrial import (Fig. 9, **steps 4 and 5**). In accordance, 14-3-3 proteins were proposed to  
42 play a role of mitochondrial import stimulating factors as part of the so-called guidance complex  
43 including chaperones such as HSP70 [73]. In turn, such unique, conditional binding using  
44 Ser195 phosphosite would also affect the rate of transition of STARD1 between folded and

1 unfolded states and may interfere with STARD1 degradation and dephosphorylation (Fig. 9,  
2 **steps 3-6**).  
3 The reported 50% enhancement of the steroidogenic activity of STARD1 by Ser195  
4 phosphorylation [32] and the inability of S195A mutated STARD1 transgene to rescue STARD1<sup>-/-</sup>  
5 phenotype in knockout mice [9] together hint at the critical importance of this phosphorylation  
6 site in STARD1 functioning. In addition, S195A mutation was found in a patient with classic  
7 LCAH [9]. Individuals with the nonclassic LCAH disorder may have the R192C mutation  
8 associated with ~2-fold reduction in the steroidogenic activity [74]. Since this mutation is at the  
9 key -3 position within the Ser195 phosphopeptide of STARD1, it is likely it will affect  
10 interaction with 14-3-3 and hence interfere with STARD1 function and mitochondrial import, a  
11 hypothesis that warrants further investigation *in vivo*.  
12

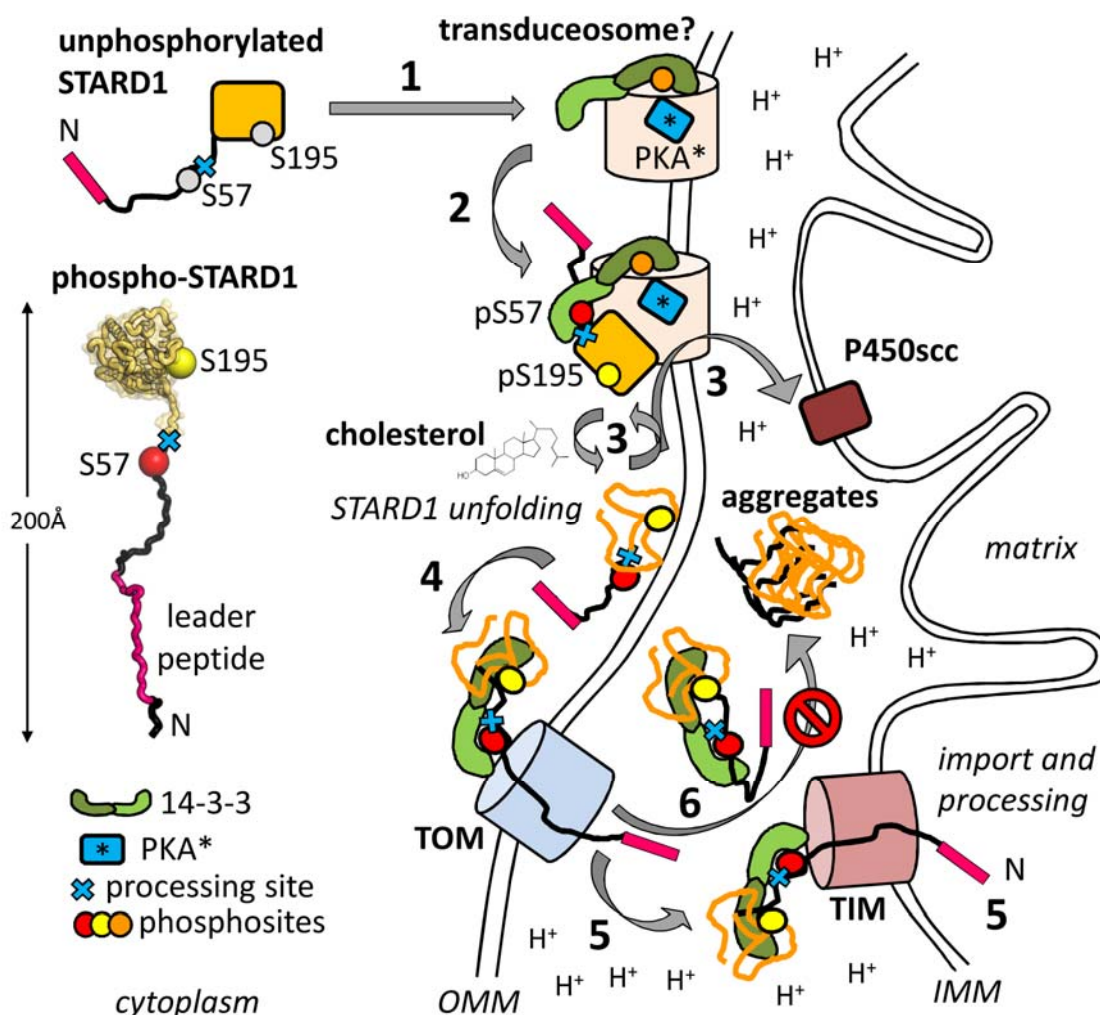

13  
14  
15 **Fig. 9. Plausible mechanism of STARD1 regulation by the 14-3-3 protein.** Key elements of  
16 each protein are labelled. Insert shows the full STARD1 model (residues 1-285) built by Bioserf  
17 [75] and depicted schematically to show the real proportion of the N-terminal peptide and  
18 STARD1 domain. Steps 1-6 are described in the text. IMM – inner mitochondrial membrane,  
19 OMM – outer mitochondrial membrane, TIM and TOM – translocase components of the inner  
20 and outer membrane, respectively. Putative protein complex known as transduceosome [66] is

1 marked by a question mark and symbolizes OMM proteins recruiting STARD1 and 14-3-3  
2 (including AKAP121 and PKA for STARD1 phosphorylation on site [39]). Protons illustrate low  
3 pH in the intermembrane space, which may provoke STARD1 unfolding and aggregation,  
4 counteracted by 14-3-3. Ser195 embedded within the  $\beta$ -sheet of native STARD1 is not  
5 recognized by 14-3-3 but likely becomes operational upon STARD1 unfolding in vicinity to the  
6 mitochondrial membrane or within the intermembrane space [19, 24] (steps 4 and 6). Bidentate  
7 binding of unfolded STARD1 phosphorylated at both, Ser57 and Ser195 sites, to the 14-3-3  
8 dimer protects STARD1 from dephosphorylation, aggregation and degradation, interfering with  
9 STARD1 import into mitochondria and its processing. Conditional binding of Ser195  
10 phosphosite to 14-3-3 can influence the folded-unfolded STARD1 turnover required for the  
11 cholesterol transfer.  
12

# METHODS

## Cloning, protein expression and purification

Wild-type full-length human 14-3-3 $\gamma$  (Uniprot P61981) and human 14-3-3 $\epsilon$  devoid of the C-terminal flexible tail (14-3-3 $\epsilon\Delta$ C construct; Uniprot P62258) were produced as described [63, 76]. The engineered monomeric form of the human 14-3-3 $\zeta$  (Uniprot P63104) carrying the monomerizing amino acid substitutions <sup>12</sup>LAE<sup>14</sup>  $\rightarrow$  <sup>12</sup>QQR<sup>14</sup> on top of the dimer-destabilizing phosphomimicking mutation, S58E, was produced as described [57].

Chimeric constructs of the human 14-3-3 $\sigma\Delta$ C with the STARD1 phosphopeptides Ser57 and Ser195 were produced on the basis of the previously described 14-3-3 $\sigma$  chimeric protein with the HSPB6 phosphopeptide [60], using high-fidelity *Pfu* polymerase and the following reverse primers: 5'-ATATCTCGAGTCAACGAGATCCCAGCAGGCTGCTGCGGCGCAGGGATC-3' for Ser57 and 5'-ATATCTCGAGTCAAGCCAGCACACAGGTGGAGCCGCGGCGCAGGGATC-3' for Ser195 peptides (*Xho*I sites are underlined). PCR products were cloned into a pET28-his-3C vector using *Nde*I and *Xho*I sites to produce proteins with the 3C protease-cleavable N-terminal His-tags [59, 60]. Such chimeric protein constructs contained amino acid substitutions <sup>75</sup>EEK<sup>77</sup>  $\rightarrow$  <sup>75</sup>AAA<sup>77</sup> promoting crystallization [60]. Chimeric proteins were co-expressed with the catalytically active subunit of mouse PKA [59, 60] and purified by subtractive immobilized metal-affinity chromatography including 3C cleavage of the His-MBP tag and gel-filtration.

The 14-3-3 $\gamma/\epsilon$  heterodimer was obtained as described [77]. Briefly, the His<sub>6</sub>-tagged 14-3-3 $\epsilon$  was allowed to equilibrate with the excess of untagged 14-3-3 $\gamma$  (overnight at 4 °C) and then loaded on a 1 ml HisTrap HP column (GE Healthcare) while the flowthrough fraction containing 14-3-3 $\gamma$  was collected. After a washing step, the bound heterodimer was eluted with 200 mM imidazole and then buffer-exchanged into SEC buffer.

Human STARD1<sub>66-285</sub> (Uniprot P49675) was cloned into the H-MBP-3C vector using *Bam*HI and *Hind*III sites, expressed and purified as described [26]. The S195E phosphomimicking mutant of STARD1<sub>66-285</sub> was obtained using the wild-type construct as a template, as described earlier [40, 54]. The longer constructs extending to residue 53 or 46 were obtained using the wild-type STARD1<sub>66-285</sub> plasmid as a template, high-fidelity *Pfu* polymerase and the following forward primers:

5'-TATAGGATCCAGGAGGAGGTCCTCCCTGCTGGGAAGCAGGCTCGAGGAACTCTCTACAGTGACCAGG-3' for STARD1<sub>53-285</sub>; 5'-

ATATAGGATCCACTTGGATTAATCAAGTTAGGAGGAGGGCTTCCCTGCTGGGAAGC-3' for STARD1<sub>46-285</sub>-S56A and 5'-

ATATAGGATCCACTTGGATTAATCAAGTTAGGAGGAGGGCTTCCCTGCCGGGAAGCAG-3' for STARD1<sub>46-285</sub>-S56A/L59P (*Bam*HI sites are underlined). Codon-optimized full-length STARD1 sequence with the S56G mutation mimicking the sequence of bovine (or sheep) ortholog and flanked by *Bam*HI and *Hind*III sites for subsequent cloning into the H-MBP-3C vector was ordered as gblocks from ITDNA Technologies (<https://eu.idtdna.com/pages>).

Human STARD3<sub>216-444</sub> (Uniprot Q14849) was kindly provided by Prof. T. Friedrich (TU Berlin) and was cloned into the pQE80 vector to produce the His-tagged protein with the N-terminal sequence MRGSHHHHHHGSACELG<sup>216</sup>**SDN.LGAR**<sup>444</sup> (STARD3 sequence is in bold font). All constructs were verified by DNA sequencing in Evrogen (<https://evrogen.com>) and used to



transform chemically competent cells of *Escherichia coli* BL21(DE3) already carrying pACYC-PKA plasmid for protein phosphorylation [59]. Purification of STARD1 constructs was achieved by subtractive immobilized metal-affinity chromatography including 3C cleavage of the His-MBP tag, and gel-filtration. The STARD3 construct retained the N-terminal his-tag. Phosphorylation of specific sites was analyzed by native gel-electrophoresis, gel band excision, in-gel trypsinolysis and tandem mass-spectrometry using a MALDI TOF/TOF ultrafleXtreme instrument (Bruker, Germany). To verify stoichiometric phosphorylation, phosphorylated STARD1 samples were incubated with either PKA or phosphatase (FastAP) in vitro followed by native PAGE analysis as described [59, 60]. Protein concentration was determined spectrophotometrically at 280 nm on a N80 Nanophotometer (Implen, Germany) using sequence-specific extinction coefficients calculated using the ProtParam tool in ExPASy.

### *Analytical size-exclusion chromatography*

The oligomeric state of proteins and interaction between 14-3-3 and STARD1 (or STARD3) constructs were analyzed by size-exclusion chromatography on a Superdex 200 Increase 5/150 column (GE Healthcare) operated at 0.1 ml/min flow rate using a Varian ProStar 335/ProStar 363 system. Where specified, a Superdex 200 Increase 10/300 column (GE Healthcare) operated at a 1.5 ml/min flow rate was used. The columns were equilibrated by a SEC buffer (20 mM Tris-HCl buffer, pH 7.6, containing 150 mM NaCl, 5 mM MgCl<sub>2</sub> and 3 mM β-mercaptoethanol (ME)) and calibrated by the following protein markers: BSA trimer (198 kDa), BSA dimer (132 kDa), BSA monomer (66 kDa), ovalbumin (43 kDa), α-lactalbumin (15 kDa). The profiles were followed by 298 nm absorbance to avoid detector overload by highly concentrated protein samples. All experiments were performed at least three times and the most typical results are presented.

### *Small-angle X-ray scattering (SAXS)*

The solution structure of STARD3 was analyzed by SAXS at the P12 beamline (PETRA III, DESY Hamburg, Germany) using inline SEC for the peak-specific data collection, to avoid contamination with protein oligomers and aggregates. The 100-μl sample (8 mg/ml) was loaded on a Superdex 200 Increase 10/300 column (GE Healthcare) pre-equilibrated with filtered and degassed SEC buffer containing 3% glycerol and 5 mM dithiothreitol instead of MgCl<sub>2</sub> and β-mercaptoethanol. The column was operated at a 0.5 ml/min flow rate. Only the monomeric STARD3 peak was used for analysis. SAXS data frames were buffer subtracted and processed using CHROMIXS [78]. No radiation damage for protein frames was observed. The final SAXS curve averaged across the STARD3 peak was used for modeling in CORAL [79]. For this, the 5I9J crystal structure of STARD3 was supplemented with 31 flexible N-terminal residues to account for differences in the constructs. CRY SOL [80] was exploited to calculate the theoretical scattering profile from models with varying conformation of the N-terminal peptide as well as the discrepancies between the profiles calculated for each conformation and the experimental SAXS profile.

### *Crystallization and structure determination of the chimeric 14-3-3/STARD1 phosphopeptide protein constructs*

1  
2 Search of suitable crystallization conditions for the chimeric 14-3-3 proteins containing the  
3 STARD1 phosphopeptides was performed immediately after the final purification step, by the  
4 sitting-drop vapor diffusion, using commercial screens: JCSG+ (Molecular Dimensions), Index,  
5 Crystal Screen (Hampton Research) and PACT (Qiagen). Crystals formed in several conditions  
6 with the best conditions summarized in Supplementary Table 2. Crystallization plates were  
7 stored at 6 °C and were periodically monitored using a Rigaku plate imager equipped with a  
8 Vis/UV-scanning and detection system.  
9 Crystals were mounted in nylon loops directly from the crystallization drops and vitrified in  
10 liquid nitrogen. X-ray diffraction data (Supplementary Table 3) were collected at 100 K at I04  
11 and I04-1 beamlines at the Diamond Light Source (UK) using Dectris EIGER2 X 16M (I04) and  
12 PILATUS 6MF (I04-1) detectors.  
13 Diffraction data were processed using XDS/XSCALE [81]. The structures were solved by  
14 molecular replacement using MolRep [82] with 14-3-3 $\sigma$  dimer (PDB 5LU1) as a search model.  
15 The phosphopeptides were built *de novo* by manual placement of the corresponding amino acid  
16 residues into difference electron density maps in Coot [83]. Structure refinement was conducted  
17 using Buster 2.10.3 [84] which included a rigid-body refinement of all chains followed by an all-  
18 atom and individual B-factor restrained refinement (the refinement statistics is shown in  
19 Supplementary Table 3).

## 20 21 *Surface plasmon resonance*

22  
23 The kinetics of pSTARD1<sub>46-285</sub>-S56A/L59P interaction with either the His-tagged 14-3-3 $\epsilon$  or its  
24 heterodimer with untagged 14-3-3 $\gamma$  was studied by surface plasmon resonance on a BIAcore™  
25 X instrument (Pharmacia Biosensor AB, Sweden) using an NTA sensor chip (BR-1000-34) with  
26 a nitrilotriacetic acid (NTA) modified surface. One of the two cells was used as an analytical  
27 cell, with the second cell used as a reference. His<sub>6</sub>-tagged 14-3-3 was immobilized on the chip by  
28 passing its 1 mg/ml solution in a 20 mM Tris-HCl buffer, pH 7.5, 250 mM NaCl, 2 mM  $\beta$ -  
29 mercaptoethanol, 5 mM MgCl<sub>2</sub> over the chip surface (total volume of 80  $\mu$ l at a flow rate of 10  
30  $\mu$ l/min). The solution was passed only through the analytical cell, the reference cell remained  
31 closed. Then, both cells were opened and pSTARD1 samples with varying protein concentration  
32 were applied while recording the kinetics of protein interaction. Data processing and analysis  
33 were performed using BIAevaluation (Biacore) and OriginLab 9.0. Binding constants were  
34 calculated in the approximation of equilibrium conditions using equation:

$$35 \quad R_{eq} = (K_A * C * R_{max}) / (1 + K_A * C),$$

36 where  $K_A$  is the equilibrium binding constant,  $C$  is the concentration of the added protein,  $R_{eq}$  is  
37 the signal difference in the analytical cell and the reference cell at a given protein concentration,  
38  $R_{max}$  is the limiting level of binding.

39 In the Scatchard coordinates ( $1/R_{eq}$  versus  $1/C$ ), this dependence takes a linear form. The  
40 intersection point of the straight line with the ordinate axis gives  $1/R_{max}$ , and the slope of the  
41 linearized dependence gives  $1/K_A * C * R_{max}$ , whence the  $K_A$  value was obtained. The kinetic  
42 dissociation constant was calculated in the approximation of the irreversible reaction, because  
43 dissociation products are washed out of the reaction medium by a liquid flow and the reaction  
44 becomes irreversible.

45 The model of complex dissociation was calculated in BIAevaluation according to the equation:

$R = R_0 \exp(-k_{\text{off}}(t - t_0)) + \text{Offset}$ ,  
 where  $R$  is the signal value at time  $t$ ,  $k_{\text{off}}$  is the kinetic dissociation constant, Offset is the signal level at the initial time  $t_0$ .  
 $R$  and  $R_0$  values obtained from the dissociation region of the sensorgrams led to the  $k_{\text{off}}$  value determination. The relations  $K_A = 1/K_D = k_{\text{on}}/k_{\text{off}}$  were used to determine the values of the kinetic association constant ( $k_{\text{on}}$ ) and the equilibrium dissociation constant ( $K_D$ ).

### *Time-resolved fluorescence anisotropy*

22NC cholesterol analog was dissolved in 96% ethanol to get a 200- $\mu\text{M}$  stock solution (concentration was measured by absorbance at 470 nm using the extinction coefficient of 21,000  $\text{M}^{-1} \text{cm}^{-1}$ ) and then diluted down to 1  $\mu\text{M}$  into 20 mM Tris-HCl buffer, pH 7.5, containing 150 mM NaCl and 5 mM  $\text{MgCl}_2$ .

22NC fluorescence in different environments (free dye or its complex with pSTARD1<sub>46-285</sub>-S56A/L59P in the absence or presence of 14-3-3 $\gamma$ ) was recorded using a time- and wavelength-correlated single-photon counting (TCSPC) system based on a single TCSPC module (SPC-130EM, Becker & Hickl GmbH, Germany). Fluorescence was detected by a cooled ultrafast single-photon counting detector (HPM-100-07C, Becker and Hickl, Germany) with a low dark count rate ( $\sim 10$  counts per second), coupled to a monochromator (ML-44, Solar, Belarus). Excitation was performed with a 455 nm laser diode (InTop, Russia) driven at a repetition rate up to 50 MHz. A 500-nm long-pass filter (Thorlabs, USA) was used to block excitation light. To measure the kinetics of fluorescence anisotropy we used a filter-based system with a set of two ultra-broadband wire-grid polarizers WP25M-UB (Thorlabs, USA) mounted into motorized rotation mounts K10CR1/M (Thorlabs, USA). Fluorescence decay kinetics  $I(t)$  were measured at different positions of the emission polarizer – in parallel ( $\parallel$ ) and perpendicular ( $\perp$ ) orientation to the excitation polarizer and the anisotropy kinetics  $r(t)$  was calculated as:

$$r(t) = \frac{I(t)_{\parallel} - I(t)_{\perp}}{I(t)_{\parallel} + 2I(t)_{\perp}}$$

By using two different repetition rates of the laser (50 and 25 MHz) we achieved the time resolution of up to 3.3 ps and were able to follow slow changes in the anisotropy of the dye in complex with proteins. The temperature of the sample was stabilized at 25 °C by a Peltier-controlled cuvette holder Qpod 2e (Quantum Northwest, USA). Analysis of fluorescence and anisotropy decay curves was performed by SPCImage (Becker and Hickl, Germany) and Origin Pro 9 (OriginLab Corporation, USA) software packages. The experiments were performed at least three times.

The correlation time  $\theta$  (for the rotation of a spherical protein) was calculated according to Perrin equation [85]:

$$\theta = \frac{\eta M}{RT}(\nu + h)$$

where  $\eta$  is the viscosity of the solvent,  $M$  is the molecular weight of the protein,  $\nu$  and  $h$  are the partial specific volume of the protein and its degree of hydration (both in ml/g), respectively. For estimations, water viscosity  $\eta$  was taken as 0.9 cP (at 25 °C), partial specific volume and the degree of hydration were taken as 0.73 ml/g and 0.4 ml/g [86], respectively.

### **Data availability**

Atomic coordinates and structure factors were deposited with the PDB under accession codes 6T5H and 6T5F. All other data supporting the findings of this study are available from the corresponding author upon reasonable request.

## Acknowledgments

N.N.S. is thankful to Prof. T. Friedrich (TU Berlin) for providing the STARD3 plasmid, to Dr. Ya. Faletrov (Minsk, Belarus) for providing 22NC and to Dr. Cy Jeffries (EMBL Hamburg) for help during the SAXS-756 experiment. We would like to thank Sam Hart and Johan Turkenburg for help during data collection, the Diamond Light Source for access to synchrotron beamlines (Proposal No. mx-13587). Mass-spectrometry analysis was carried out at the Shared-Access Equipment Centre “Industrial Biotechnology” of the Federal Research Center “Fundamentals of Biotechnology” of the Russian Academy of Sciences. This work was supported by the Russian Science Foundation (grant 19-74-10031 to N.N.S.) and the Wellcome Trust (206377 award to A.A.A.). Protein-protein interactions were studied in the framework of the Program of the Russian Ministry of Science and Higher Education (K.V.T. and N.N.S.).

The authors declare no conflict of interest.

## Author contributions

N.N.S. conceived the idea and supervised the study. N.N.S. and K.V.T. cloned and purified proteins, designed and performed most experiments. J.T. crystallized proteins. D.V.S. and K.V.T. performed and analyzed SPR experiments. E.G.M and K.V.T. performed and analyzed time-resolved fluorescence anisotropy measurements. N.N.S. solved and refined structures with input from A.A.A. N.N.S., E.G.M. and A.A.A interpreted all the results. N.N.S. wrote paper with input from A.A.A.

## REFERENCES

1. Miller, W. L. (2007) Mechanism of StAR's regulation of mitochondrial cholesterol import, *Mol Cell Endocrinol.* **265-266**, 46-50.
2. Clark, B. J., Ranganathan, V. & Combs, R. (2001) Steroidogenic acute regulatory protein expression is dependent upon post-translational effects of cAMP-dependent protein kinase A, *Mol Cell Endocrinol.* **173**, 183-92.
3. Clark, B. J., Wells, J., King, S. R. & Stocco, D. M. (1994) The purification, cloning, and expression of a novel luteinizing hormone-induced mitochondrial protein in MA-10 mouse Leydig tumor cells. Characterization of the steroidogenic acute regulatory protein (StAR), *J Biol Chem.* **269**, 28314-22.
4. Krueger, R. J. & Orme-Johnson, N. R. (1983) Acute adrenocorticotrophic hormone stimulation of adrenal corticosteroidogenesis. Discovery of a rapidly induced protein, *J Biol Chem.* **258**, 10159-67.
5. Pon, L. A., Hartigan, J. A. & Orme-Johnson, N. R. (1986) Acute ACTH regulation of adrenal corticosteroid biosynthesis. Rapid accumulation of a phosphoprotein, *J Biol Chem.* **261**, 13309-16.



- 1 6. Bose, H. S., Sugawara, T., Strauss, J. F., 3rd, Miller, W. L. & International Congenital Lipoid  
2 Adrenal Hyperplasia, C. (1996) The pathophysiology and genetics of congenital lipid adrenal  
3 hyperplasia, *N Engl J Med.* **335**, 1870-8.
- 4 7. Miller, W. L. (1997) Congenital lipid adrenal hyperplasia: the human gene knockout for the  
5 steroidogenic acute regulatory protein, *Journal of molecular endocrinology.* **19**, 227-40.
- 6 8. Sasaki, G., Ishii, T., Jeyasuria, P., Jo, Y., Bahat, A., Orly, J., Hasegawa, T. & Parker, K. L.  
7 (2008) Complex role of the mitochondrial targeting signal in the function of steroidogenic acute  
8 regulatory protein revealed by bacterial artificial chromosome transgenesis in vivo, *Mol*  
9 *Endocrinol.* **22**, 951-64.
- 10 9. Sasaki, G., Zubair, M., Ishii, T., Mitsui, T., Hasegawa, T. & Auchus, R. J. (2014) The  
11 contribution of serine 194 phosphorylation to steroidogenic acute regulatory protein function,  
12 *Mol Endocrinol.* **28**, 1088-96.
- 13 10. Tugaeva, K. V. & Sluchanko, N. N. (2019) Steroidogenic Acute Regulatory Protein:  
14 Structure, Functioning, and Regulation, *Biochemistry (Mosc).* **84**, S233-S253.
- 15 11. Selvaraj, V., Stocco, D. M. & Clark, B. J. (2018) Current knowledge on the acute regulation  
16 of steroidogenesis, *Biology of reproduction.* **99**, 13-26.
- 17 12. Alpy, F. & Tomasetto, C. (2005) Give lipids a START: the StAR-related lipid transfer  
18 (START) domain in mammals, *J Cell Sci.* **118**, 2791-801.
- 19 13. Thorsell, A. G., Lee, W. H., Persson, C., Siponen, M. I., Nilsson, M., Busam, R. D.,  
20 Kotenyova, T., Schuler, H. & Lehtio, L. (2011) Comparative structural analysis of lipid binding  
21 START domains, *PLoS One.* **6**, e19521.
- 22 14. Horvath, M. P., George, E. W., Tran, Q. T., Baumgardner, K., Zharov, G., Lee, S.,  
23 Sharifzadeh, H., Shihab, S., Mattinson, T., Li, B. & Bernstein, P. S. (2016) Structure of the  
24 lutein-binding domain of human StARD3 at 1.74 Å resolution and model of a complex with  
25 lutein, *Acta Crystallogr F Struct Biol Commun.* **72**, 609-18.
- 26 15. Tsujishita, Y. & Hurley, J. H. (2000) Structure and lipid transport mechanism of a StAR-  
27 related domain, *Nat Struct Biol.* **7**, 408-14.
- 28 16. Murcia, M., Faraldo-Gomez, J. D., Maxfield, F. R. & Roux, B. (2006) Modeling the  
29 structure of the StART domains of MLN64 and StAR proteins in complex with cholesterol, *J*  
30 *Lipid Res.* **47**, 2614-30.
- 31 17. Barbar, E., Lavigne, P. & Lehoux, J. G. (2009) Validation of the mechanism of cholesterol  
32 binding by StAR using short molecular dynamics simulations, *The Journal of steroid*  
33 *biochemistry and molecular biology.* **113**, 92-7.
- 34 18. Letourneau, D., Bedard, M., Cabana, J., Lefebvre, A., LeHoux, J. G. & Lavigne, P. (2016)  
35 STARD6 on steroids: solution structure, multiple timescale backbone dynamics and ligand  
36 binding mechanism, *Sci Rep.* **6**, 28486.
- 37 19. Bose, H. S., Whittal, R. M., Baldwin, M. A. & Miller, W. L. (1999) The active form of the  
38 steroidogenic acute regulatory protein, StAR, appears to be a molten globule, *Proc Natl Acad Sci*  
39 *U S A.* **96**, 7250-5.
- 40 20. Baker, B. Y., Yaworsky, D. C. & Miller, W. L. (2005) A pH-dependent molten globule  
41 transition is required for activity of the steroidogenic acute regulatory protein, StAR, *J Biol*  
42 *Chem.* **280**, 41753-60.
- 43 21. Bose, H. S., Whittal, R. M., Ran, Y., Bose, M., Baker, B. Y. & Miller, W. L. (2008) StAR-  
44 like activity and molten globule behavior of StARD6, a male germ-line protein, *Biochemistry.*  
45 **47**, 2277-88.
- 46 22. Tuckey, R. C., Bose, H. S., Czerwionka, I. & Miller, W. L. (2004) Molten globule structure  
47 and steroidogenic activity of N-218 MLN64 in human placental mitochondria, *Endocrinology.*  
48 **145**, 1700-7.
- 49 23. Bose, H. S., Baldwin, M. A. & Miller, W. L. (2000) Evidence that StAR and MLN64 act on  
50 the outer mitochondrial membrane as molten globules, *Endocr Res.* **26**, 629-37.

- 1 24. Christensen, K., Bose, H. S., Harris, F. M., Miller, W. L. & Bell, J. D. (2001) Binding of  
2 steroidogenic acute regulatory protein to synthetic membranes suggests an active molten globule,  
3 *J Biol Chem.* **276**, 17044-51.
- 4 25. Rajapaksha, M., Kaur, J., Bose, M., Whittal, R. M. & Bose, H. S. (2013) Cholesterol-  
5 mediated conformational changes in the steroidogenic acute regulatory protein are essential for  
6 steroidogenesis, *Biochemistry.* **52**, 7242-53.
- 7 26. Sluchanko, N. N., Tugaeva, K. V., Faletrov, Y. V. & Levitsky, D. I. (2016) High-yield  
8 soluble expression, purification and characterization of human steroidogenic acute regulatory  
9 protein (StAR) fused to a cleavable Maltose-Binding Protein (MBP), *Protein Expr Purif.* **119**,  
10 27-35.
- 11 27. Artemenko, I. P., Zhao, D., Hales, D. B., Hales, K. H. & Jefcoate, C. R. (2001)  
12 Mitochondrial processing of newly synthesized steroidogenic acute regulatory protein (StAR),  
13 but not total StAR, mediates cholesterol transfer to cytochrome P450 side chain cleavage  
14 enzyme in adrenal cells, *J Biol Chem.* **276**, 46583-96.
- 15 28. Baker, B. Y., Epand, R. F., Epand, R. M. & Miller, W. L. (2007) Cholesterol binding does  
16 not predict activity of the steroidogenic acute regulatory protein, StAR, *J Biol Chem.* **282**,  
17 10223-32.
- 18 29. Kallen, C. B., Billheimer, J. T., Summers, S. A., Stayrook, S. E., Lewis, M. & Strauss, J. F.,  
19 3rd (1998) Steroidogenic acute regulatory protein (StAR) is a sterol transfer protein, *J Biol*  
20 *Chem.* **273**, 26285-8.
- 21 30. Yamazaki, T., Matsuoka, C., Gendou, M., Izumi, S., Zhao, D., Artemenko, I., Jefcoate, C. R.  
22 & Kominami, S. (2006) Mitochondrial processing of bovine adrenal steroidogenic acute  
23 regulatory protein, *Biochim Biophys Acta.* **1764**, 1561-7.
- 24 31. Arakane, F., Sugawara, T., Nishino, H., Liu, Z., Holt, J. A., Pain, D., Stocco, D. M., Miller,  
25 W. L. & Strauss, J. F., 3rd (1996) Steroidogenic acute regulatory protein (StAR) retains activity  
26 in the absence of its mitochondrial import sequence: implications for the mechanism of StAR  
27 action, *Proc Natl Acad Sci U S A.* **93**, 13731-6.
- 28 32. Arakane, F., King, S. R., Du, Y., Kallen, C. B., Walsh, L. P., Watari, H., Stocco, D. M. &  
29 Strauss, J. F., 3rd (1997) Phosphorylation of steroidogenic acute regulatory protein (StAR)  
30 modulates its steroidogenic activity, *J Biol Chem.* **272**, 32656-62.
- 31 33. Arakane, F., Kallen, C. B., Watari, H., Foster, J. A., Sepuri, N. B., Pain, D., Stayrook, S. E.,  
32 Lewis, M., Gerton, G. L. & Strauss, J. F., 3rd (1998) The mechanism of action of steroidogenic  
33 acute regulatory protein (StAR). StAR acts on the outside of mitochondria to stimulate  
34 steroidogenesis, *J Biol Chem.* **273**, 16339-45.
- 35 34. Epstein, L. F. & Orme-Johnson, N. R. (1991) Regulation of steroid hormone biosynthesis.  
36 Identification of precursors of a phosphoprotein targeted to the mitochondrion in stimulated rat  
37 adrenal cortex cells, *J Biol Chem.* **266**, 19739-45.
- 38 35. Alberta, J. A., Epstein, L. F., Pon, L. A. & Orme-Johnson, N. R. (1989) Mitochondrial  
39 localization of a phosphoprotein that rapidly accumulates in adrenal cortex cells exposed to  
40 adrenocorticotrophic hormone or to cAMP, *J Biol Chem.* **264**, 2368-72.
- 41 36. Poderoso, C., Converso, D. P., Maloberti, P., Duarte, A., Neuman, I., Galli, S., Cornejo  
42 Maciel, F., Paz, C., Carreras, M. C., Poderoso, J. J. & Podesta, E. J. (2008) A mitochondrial  
43 kinase complex is essential to mediate an ERK1/2-dependent phosphorylation of a key  
44 regulatory protein in steroid biosynthesis, *PLoS One.* **3**, e1443.
- 45 37. Pezzi, V., Clark, B. J., Ando, S., Stocco, D. M. & Rainey, W. E. (1996) Role of calmodulin-  
46 dependent protein kinase II in the acute stimulation of aldosterone production, *The Journal of*  
47 *steroid biochemistry and molecular biology.* **58**, 417-24.
- 48 38. Dyson, M. T., Kowalewski, M. P., Manna, P. R. & Stocco, D. M. (2009) The differential  
49 regulation of steroidogenic acute regulatory protein-mediated steroidogenesis by type I and type  
50 II PKA in MA-10 cells, *Mol Cell Endocrinol.* **300**, 94-103.
- 51 39. Dyson, M. T., Jones, J. K., Kowalewski, M. P., Manna, P. R., Alonso, M., Gottesman, M. E.  
52 & Stocco, D. M. (2008) Mitochondrial A-kinase anchoring protein 121 binds type II protein

- 1 kinase A and enhances steroidogenic acute regulatory protein-mediated steroidogenesis in MA-  
2 10 mouse leydig tumor cells, *Biology of reproduction*. **78**, 267-77.
- 3 40. Tugaeva, K. V., Faletrov, Y. V., Allakhverdiev, E. S., Shkumatov, V. M., Maksimov, E. G.  
4 & Sluchanko, N. N. (2018) Effect of the NBD-group position on interaction of fluorescently-  
5 labeled cholesterol analogues with human steroidogenic acute regulatory protein STARD1,  
6 *Biochem Biophys Res Commun*. **497**, 58-64.
- 7 41. Aghazadeh, Y., Rone, M. B., Blonder, J., Ye, X., Veenstra, T. D., Hales, D. B., Culty, M. &  
8 Papadopoulos, V. (2012) Hormone-induced 14-3-3gamma adaptor protein regulates  
9 steroidogenic acute regulatory protein activity and steroid biosynthesis in MA-10 Leydig cells, *J*  
10 *Biol Chem*. **287**, 15380-94.
- 11 42. Aghazadeh, Y., Ye, X., Blonder, J. & Papadopoulos, V. (2014) Protein modifications  
12 regulate the role of 14-3-3gamma adaptor protein in cAMP-induced steroidogenesis in MA-10  
13 Leydig cells, *J Biol Chem*. **289**, 26542-53.
- 14 43. Aitken, A. (2006) 14-3-3 proteins: a historic overview, *Semin Canc Biol*. **16**, 162-172.
- 15 44. Obsil, T. & Obsilova, V. (2011) Structural basis of 14-3-3 protein functions, *Semin Cell Dev*  
16 *Biol*. **22**, 663-72.
- 17 45. Jones, D. H., Ley, S. & Aitken, A. (1995) Isoforms of 14-3-3 protein can form homo- and  
18 heterodimers in vivo and in vitro: implications for function as adapter proteins, *FEBS Lett*. **368**,  
19 55-8.
- 20 46. Gu, Y.-M., Jin, Y.-H., Choi, J.-K., Baek, K.-H., Yeo, C.-Y. & Lee, K.-Y. (2006) Protein  
21 kinase A phosphorylates and regulates dimerization of 14-3-3 epsilon, *FEBS Lett*. **580**, 305-310.
- 22 47. Woodcock, J. M., Murphy, J., Stomski, F. C., Berndt, M. C. & Lopez, A. F. (2003) The  
23 dimeric versus monomeric status of 14-3-3zeta is controlled by phosphorylation of Ser58 at the  
24 dimer interface, *J Biol Chem*. **278**, 36323-36327.
- 25 48. Liapis, A., Chen, F. W., Davies, J. P., Wang, R. & Ioannou, Y. A. (2012) MLN64 transport  
26 to the late endosome is regulated by binding to 14-3-3 via a non-canonical binding site, *PLoS*  
27 *One*. **7**, e34424.
- 28 49. Robert, X. & Gouet, P. (2014) Deciphering key features in protein structures with the new  
29 ENDscript server, *Nucleic Acids Res*. **42**, W320-4.
- 30 50. Yaffe, M. B., Rittinger, K., Volinia, S., Caron, P. R., Aitken, A., Leffers, H., Gamblin, S. J.,  
31 Smerdon, S. J. & Cantley, L. C. (1997) The structural basis for 14-3-3:phosphopeptide binding  
32 specificity, *Cell*. **91**, 961-971.
- 33 51. Gambaryan, S., Butt, E., Marcus, K., Glazova, M., Palmetshofer, A., Guillon, G. &  
34 Smolenski, A. (2003) cGMP-dependent protein kinase type II regulates basal level of  
35 aldosterone production by zona glomerulosa cells without increasing expression of the  
36 steroidogenic acute regulatory protein gene, *J Biol Chem*. **278**, 29640-8.
- 37 52. Fleury, A., Mathieu, A. P., Ducharme, L., Hales, D. B. & LeHoux, J. G. (2004)  
38 Phosphorylation and function of the hamster adrenal steroidogenic acute regulatory protein  
39 (StAR), *The Journal of steroid biochemistry and molecular biology*. **91**, 259-71.
- 40 53. LeHoux, J. G., Fleury, A., Ducharme, L. & Hales, D. B. (2004) Phosphorylation of the  
41 hamster adrenal steroidogenic acute regulatory protein as analyzed by two-dimensional  
42 polyacrylamide gel electrophoreses, *Mol Cell Endocrinol*. **215**, 127-34.
- 43 54. Sluchanko, N. N., Tugaeva, K. V. & Maksimov, E. G. (2017) Solution structure of human  
44 steroidogenic acute regulatory protein STARD1 studied by small-angle X-ray scattering,  
45 *Biochem Biophys Res Commun*. **489**, 445-450.
- 46 55. Crooks, G. E., Hon, G., Chandonia, J. M. & Brenner, S. E. (2004) WebLogo: a sequence  
47 logo generator, *Genome research*. **14**, 1188-90.
- 48 56. Johnson, C., Crowther, S., Stafford, M. J., Campbell, D. G., Toth, R. & MacKintosh, C.  
49 (2010) Bioinformatic and experimental survey of 14-3-3-binding sites, *Biochem J*. **427**, 69-78.
- 50 57. Sluchanko, N. N. & Uversky, V. N. (2015) Hidden disorder propensity of the N-terminal  
51 segment of universal adapter protein 14-3-3 is manifested in its monomeric form: Novel insights  
52 into protein dimerization and multifunctionality, *Biochim Biophys Acta*. **1854**, 492-504.

- 1 58. Astuti, P., Boutros, R., Ducommun, B. & Gabrielli, B. (2010) Mitotic phosphorylation of  
2 Cdc25B Ser321 disrupts 14-3-3 binding to the high affinity Ser323 site, *J Biol Chem.* **285**,  
3 34364-70.
- 4 59. Tugaeva, K. V., Tsvetkov, P. O. & Sluchanko, N. N. (2017) Bacterial co-expression of  
5 human Tau protein with protein kinase A and 14-3-3 for studies of 14-3-3/phospho-Tau  
6 interaction, *PLoS One.* **12**, e0178933.
- 7 60. Sluchanko, N. N., Tugaeva, K. V., Greive, S. J. & Antson, A. A. (2017) Chimeric 14-3-3  
8 proteins for unraveling interactions with intrinsically disordered partners, *Sci Rep.* **7**, 12014.
- 9 61. Gardino, A., Smerdon, S. & Yaffe, M. (2006) Structural determinants of 14-3-3 binding  
10 specificities and regulation of subcellular localization of 14-3-3-ligand complexes: a comparison  
11 of the X-ray crystal structures of all human 14-3-3 isoforms, *Semin Canc Biol.* **16**, 173-182.
- 12 62. Yang, X., Lee, W. H., Sobott, F., Papagrigoriou, E., Robinson, C., Grossmann, G.,  
13 Sundström, M., Doyle, D. & Elkins, J. (2006) Structural basis for protein-protein interactions in  
14 the 14-3-3 protein family, *Proc Natl Acad Sci U S A.* **103**, 17237-17242.
- 15 63. Sluchanko, N. N., Beelen, S., Kulikova, A. A., Weeks, S. D., Antson, A. A., Gusev, N. B. &  
16 Strelkov, S. V. (2017) Structural Basis for the Interaction of a Human Small Heat Shock Protein  
17 with the 14-3-3 Universal Signaling Regulator, *Structure.* **25**, 305-316.
- 18 64. Bustos, D. M. & Iglesias, A. A. (2006) Intrinsic disorder is a key characteristic in partners  
19 that bind 14-3-3 proteins, *Proteins.* **63**, 35-42.
- 20 65. Duarte, M. L., Pena, D. A., Nunes Ferraz, F. A., Berti, D. A., Paschoal Sobreira, T. J.,  
21 Costa-Junior, H. M., Abdel Baqui, M. M., Disatnik, M. H., Xavier-Neto, J., Lopes de Oliveira, P.  
22 S. & Schechtman, D. (2014) Protein folding creates structure-based, noncontiguous consensus  
23 phosphorylation motifs recognized by kinases, *Sci Signal.* **7**, ra105.
- 24 66. Rone, M. B., Midzak, A. S., Issop, L., Rammouz, G., Jagannathan, S., Fan, J., Ye, X.,  
25 Blonder, J., Veenstra, T. & Papadopoulos, V. (2012) Identification of a dynamic mitochondrial  
26 protein complex driving cholesterol import, trafficking, and metabolism to steroid hormones,  
27 *Mol Endocrinol.* **26**, 1868-82.
- 28 67. Liu, J., Rone, M. B. & Papadopoulos, V. (2006) Protein-protein interactions mediate  
29 mitochondrial cholesterol transport and steroid biosynthesis, *J Biol Chem.* **281**, 38879-93.
- 30 68. Yaffe, M. (2002) How do 14-3-3 proteins work?-- Gatekeeper phosphorylation and the  
31 molecular anvil hypothesis, *FEBS Lett.* **513**, 53-57.
- 32 69. Ganguly, S., Gastel, J. A., Weller, J. L., Schwartz, C., Jaffe, H., Namboodiri, M. A., Coon,  
33 S. L., Hickman, A. B., Rollag, M., Obsil, T., Beauverger, P., Ferry, G., Boutin, J. A. & Klein, D.  
34 C. (2001) Role of a pineal cAMP-operated arylalkylamine N-acetyltransferase/14-3-3-binding  
35 switch in melatonin synthesis, *Proc Natl Acad Sci U S A.* **98**, 8083-8.
- 36 70. Dobson, M., Ramakrishnan, G., Ma, S., Kaplun, L., Balan, V., Fridman, R. & Tzivion, G.  
37 (2011) Bimodal regulation of FoxO3 by AKT and 14-3-3, *Biochim Biophys Acta.* **1813**, 1453-64.
- 38 71. Sluchanko, N. N. & Gusev, N. B. (2017) Moonlighting chaperone-like activity of the  
39 universal regulatory 14-3-3 proteins, *FEBS J.* **284**, 1279-1295.
- 40 72. Johnson, C., Tinti, M., Wood, N. T., Campbell, D. G., Toth, R., Dubois, F., Geraghty, K. M.,  
41 Wong, B. H., Brown, L. J., Tyler, J., Gernez, A., Chen, S., Synowsky, S. & MacKintosh, C.  
42 (2011) Visualization and biochemical analyses of the emerging mammalian 14-3-3-  
43 phosphoproteome, *Mol Cell Proteomics.* **10**, M110 005751.
- 44 73. Komiya, T., Hachiya, N., Sakaguchi, M., Omura, T. & Mihara, K. (1994) Recognition of  
45 mitochondria-targeting signals by a cytosolic import stimulation factor, MSF, *J Biol Chem.* **269**,  
46 30893-7.
- 47 74. Sahakitrungruang, T., Soccio, R. E., Lang-Muritano, M., Walker, J. M., Achermann, J. C. &  
48 Miller, W. L. (2010) Clinical, genetic, and functional characterization of four patients carrying  
49 partial loss-of-function mutations in the steroidogenic acute regulatory protein (StAR), *J Clin*  
50 *Endocrinol Metab.* **95**, 3352-9.
- 51 75. Buchan, D. W., Minneci, F., Nugent, T. C., Bryson, K. & Jones, D. T. (2013) Scalable web  
52 services for the PSIPRED Protein Analysis Workbench, *Nucleic Acids Res.* **41**, W349-57.



- 1 76. Chernik, I., Seit-Nebi, A., Marston, S. & Gusev, N. (2007) Small heat shock protein Hsp20  
2 (HspB6) as a partner of 14-3-3gamma, *Mol Cell Biochem.* **295**, 9-17.
- 3 77. Ghorbani, S., Fossbakk, A., Jorge-Finnigan, A., Flydal, M. I., Haavik, J. & Kleppe, R.  
4 (2016) Regulation of tyrosine hydroxylase is preserved across different homo- and heterodimeric  
5 14-3-3 proteins, *Amino acids.* **48**, 1221-9.
- 6 78. Panjkovich, A. & Svergun, D. I. (2018) CHROMIXS: automatic and interactive analysis of  
7 chromatography-coupled small-angle X-ray scattering data, *Bioinformatics.* **34**, 1944-1946.
- 8 79. Petoukhov, M. V., Franke, D., Shkumatov, A. V., Tria, G., Kikhney, A. G., Gajda, M.,  
9 Gorba, C., Mertens, H. D. T., Konarev, P. V. & Svergun, D. I. (2012) New developments in the  
10 ATSAS program package for small-angle scattering data analysis, *J Appl Cryst.* **45**, 342-350.
- 11 80. Svergun, D. I., Barberato, C. & Koch, M. H. J. (1995) CRY SOL - a Program to Evaluate X-  
12 ray Solution Scattering of Biological Macromolecules from Atomic Coordinates, *J Appl Cryst.*  
13 **28**, 768-773.
- 14 81. Kabsch, W. (2010) Xds, *Acta Crystallogr D Biol Crystallogr.* **66**, 125-32.
- 15 82. Vagin, A. & Teplyakov, A. (2010) Molecular replacement with MOLREP, *Acta Crystallogr*  
16 *D Biol Crystallogr.* **66**, 22-5.
- 17 83. Emsley, P. & Cowtan, K. (2004) Coot: model-building tools for molecular graphics, *Acta*  
18 *Crystallogr D Biol Crystallogr.* **60**, 2126-32.
- 19 84. Blanc, E., Roversi, P., Vonnrhein, C., Flensburg, C., Lea, S. M. & Bricogne, G. (2004)  
20 Refinement of severely incomplete structures with maximum likelihood in BUSTER-TNT, *Acta*  
21 *Crystallogr D Biol Crystallogr.* **60**, 2210-21.
- 22 85. Lakowicz, J. R. (2013) *Principles of fluorescence spectroscopy*, Springer Science &  
23 Business Media.
- 24 86. Kuntz, I. D. & Kauzmann, W. (1974) Hydration of Proteins and Polypeptides in *Advances in*  
25 *Protein Chemistry* (Anfinsen, C. B., Edsall, J. T. & Richards, F. M., eds) pp. 239-345, Academic  
26 Press.  
27  
28

# 1 TABLES

2

## 3 **Table 1. Quantitation by surface plasmon resonance of the interaction between doubly** 4 **phosphorylated STARD1<sub>46-285</sub>-S56A/L59P and the His-tagged immobilized 14-3-3.**

| 14-3-3 type                      | K <sub>D</sub> (M)   | K <sub>A</sub> (1/M) | k <sub>off</sub> (1/s) | k <sub>on</sub> (1/(M*s)) |
|----------------------------------|----------------------|----------------------|------------------------|---------------------------|
| His-tagged 14-3-3ε homodimer     | 1.3*10 <sup>-5</sup> | 7.7*10 <sup>4</sup>  | 5.8*10 <sup>-3</sup>   | 0.4*10 <sup>-3</sup>      |
| His-tagged 14-3-3ε/γ heterodimer | 1.5*10 <sup>-5</sup> | 6.7*10 <sup>4</sup>  | 5.7*10 <sup>-3</sup>   | 0.4*10 <sup>-3</sup>      |

5
